# Supplementary material for: A hyaena on stilts: comparison of the limb morphology of Ictitherium ebu (Mammalia: Hyaenidae) from the Late Miocene of Lothagam, Turkana Basin, Kenya with extant Canidae and Hyaenidae
Source: PeerJ journal article supplement (doi:10.7717/peerj.17405), 2024-06-10

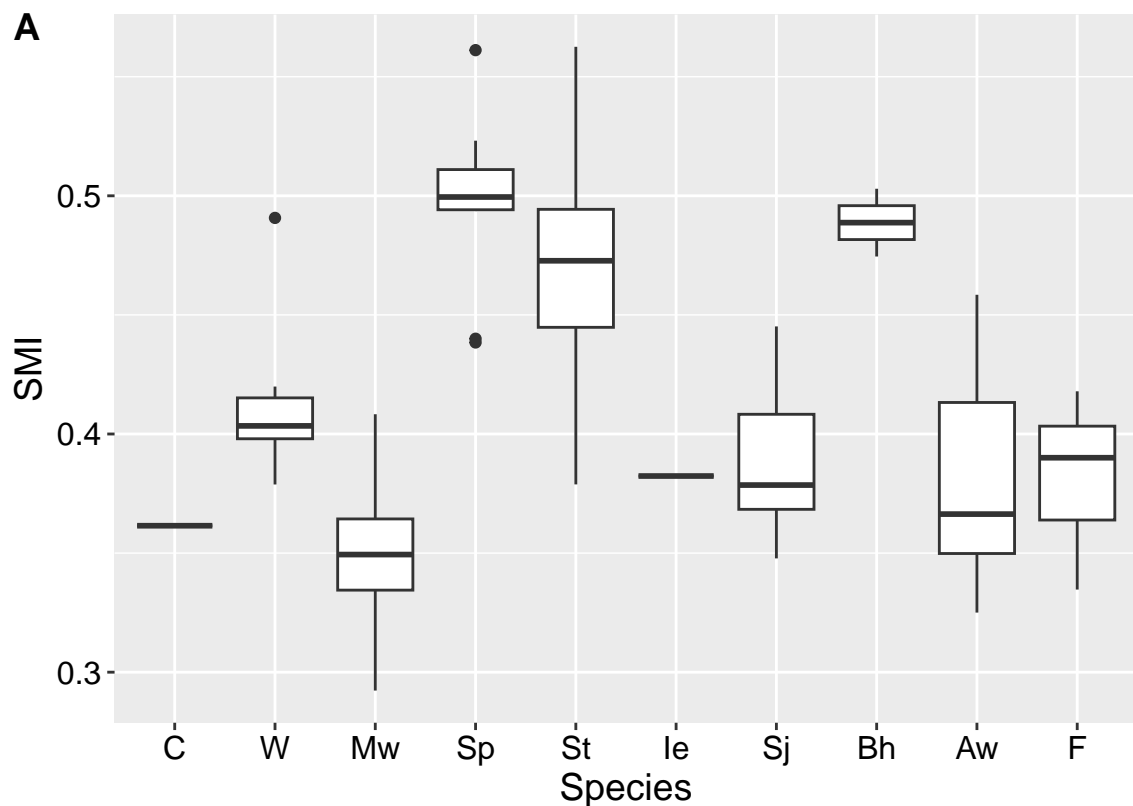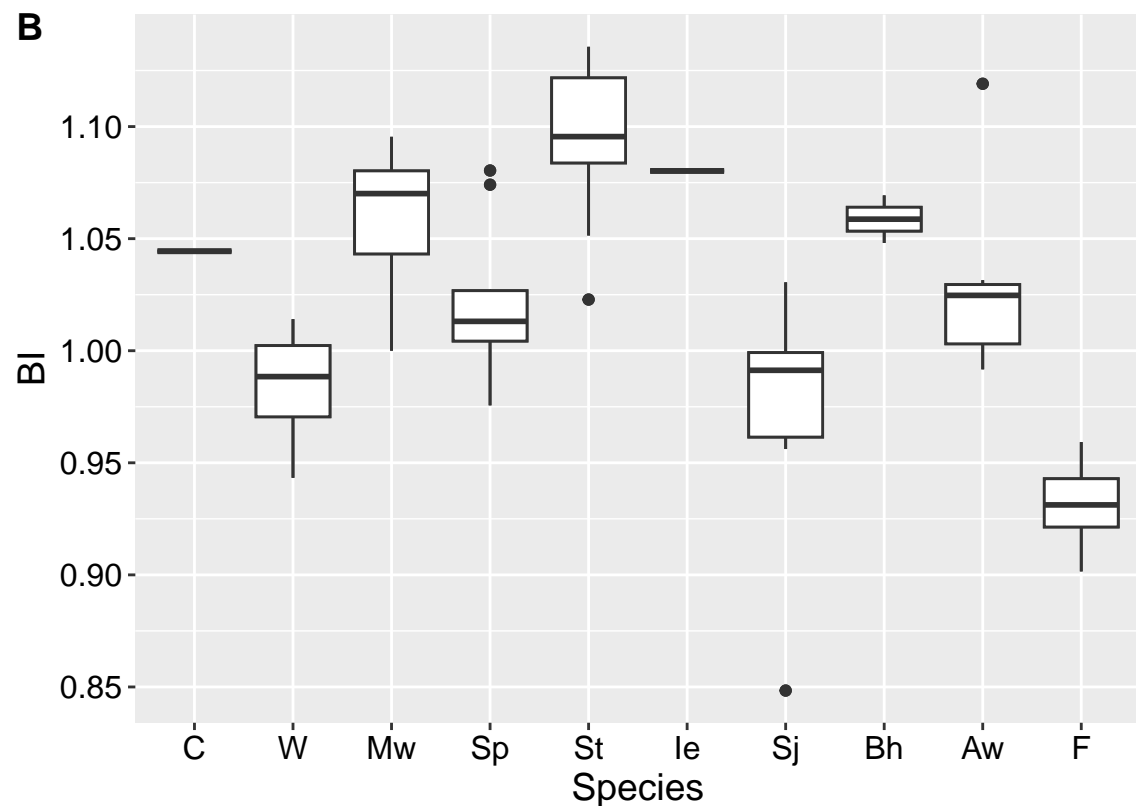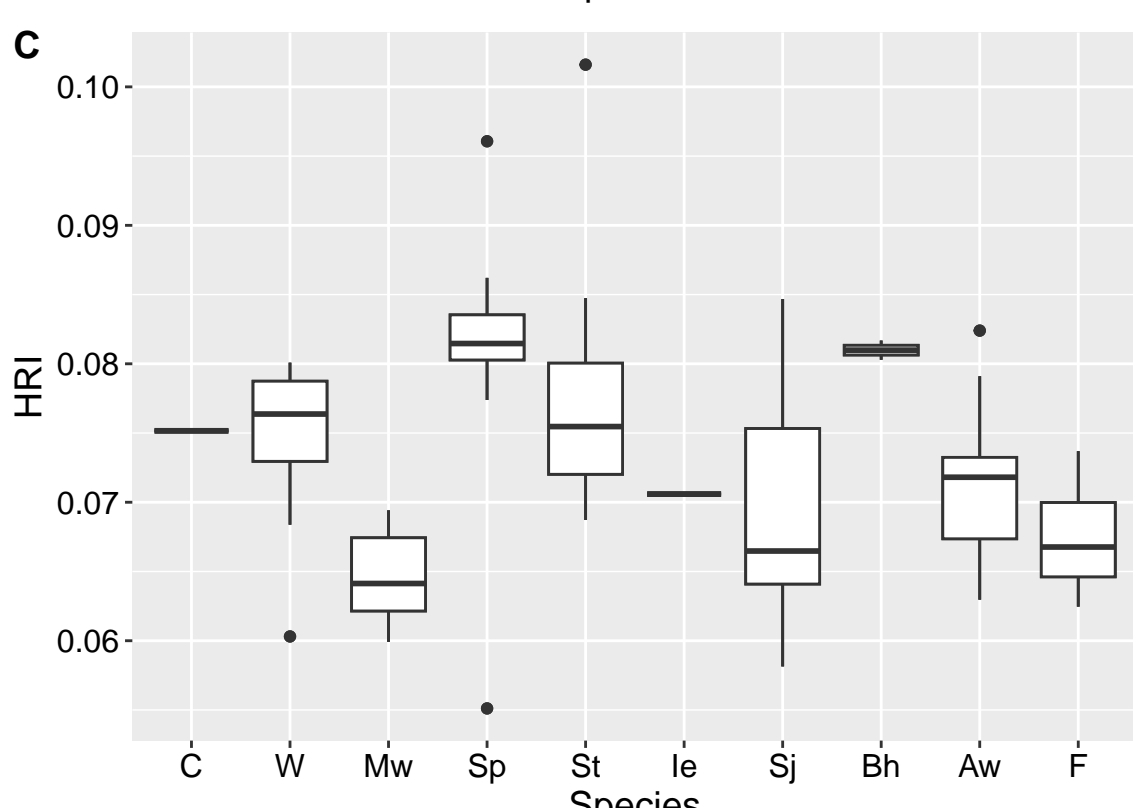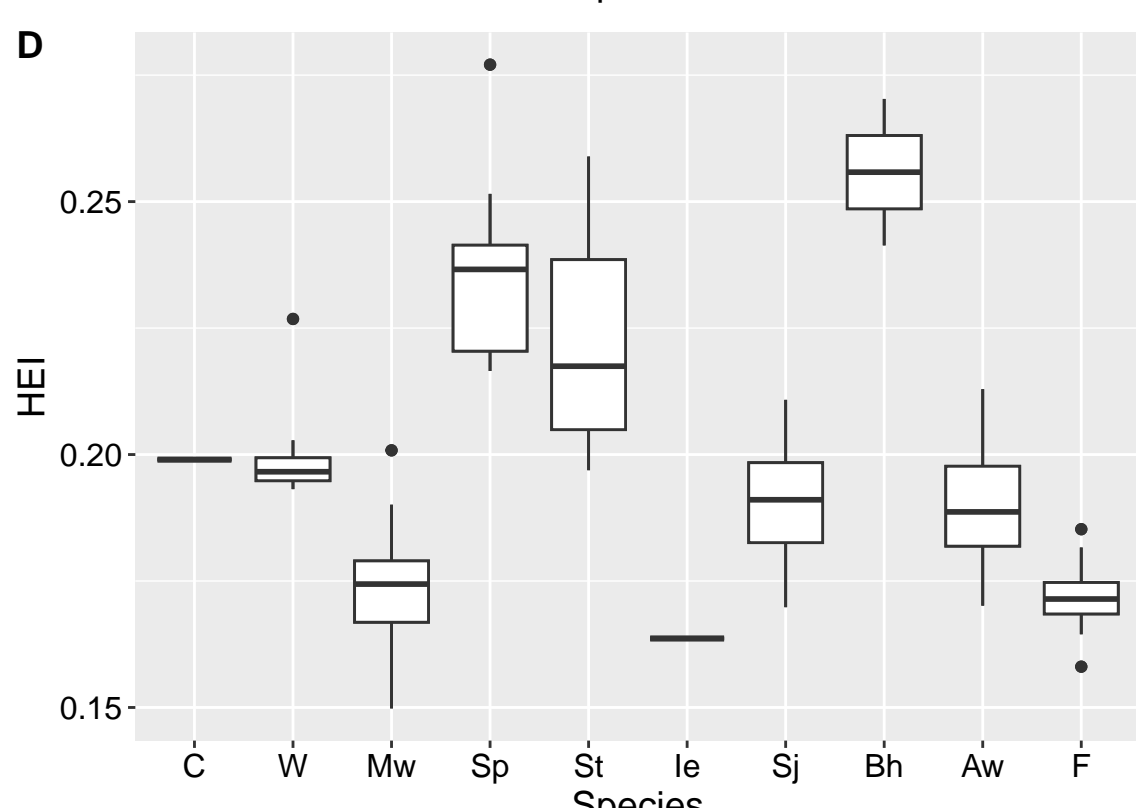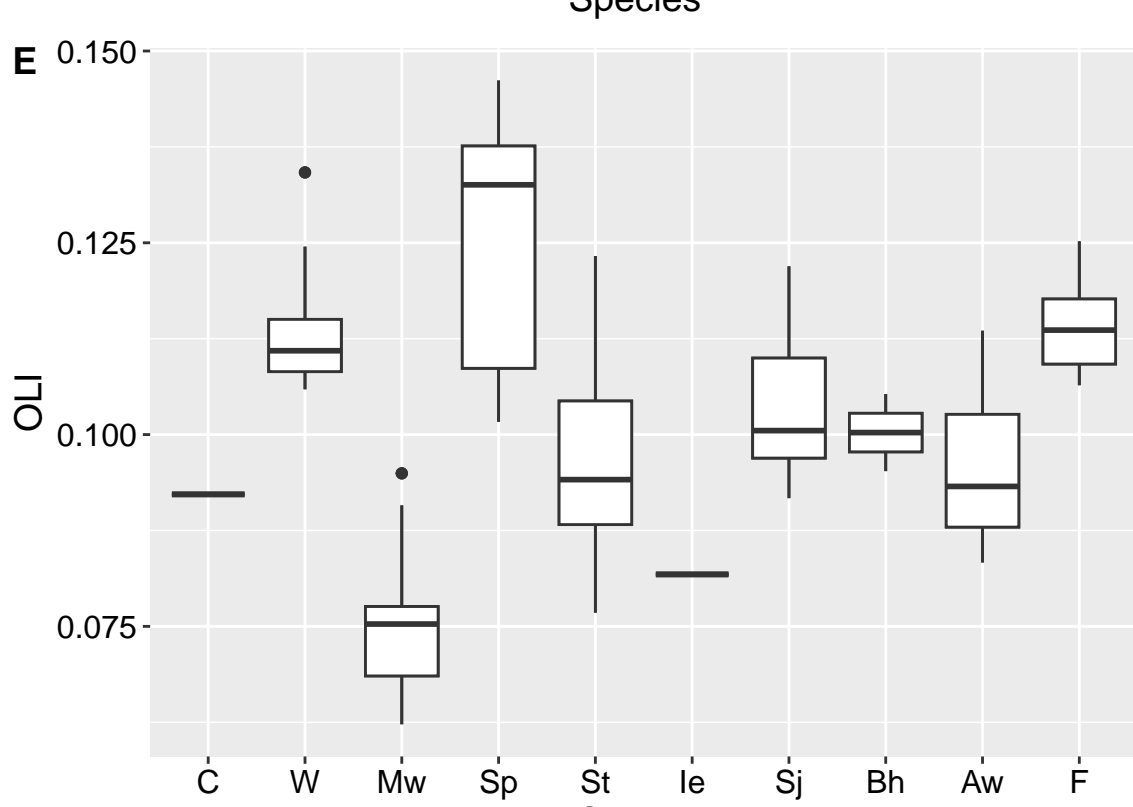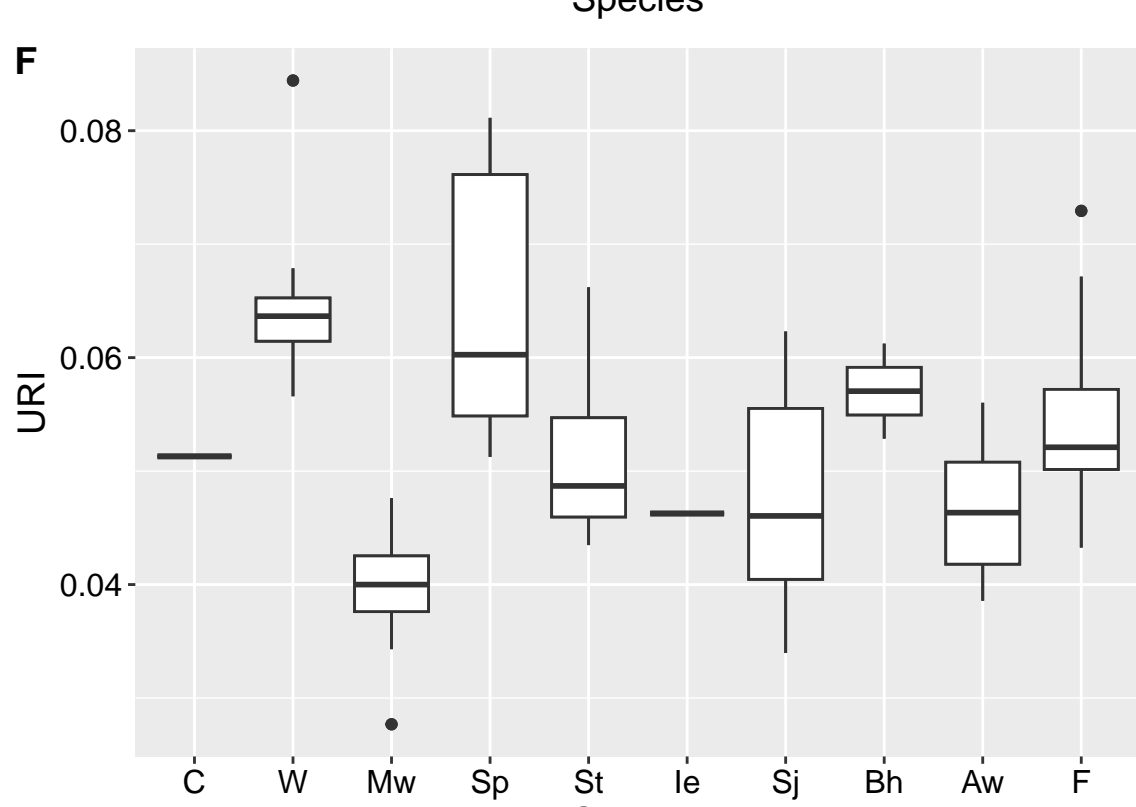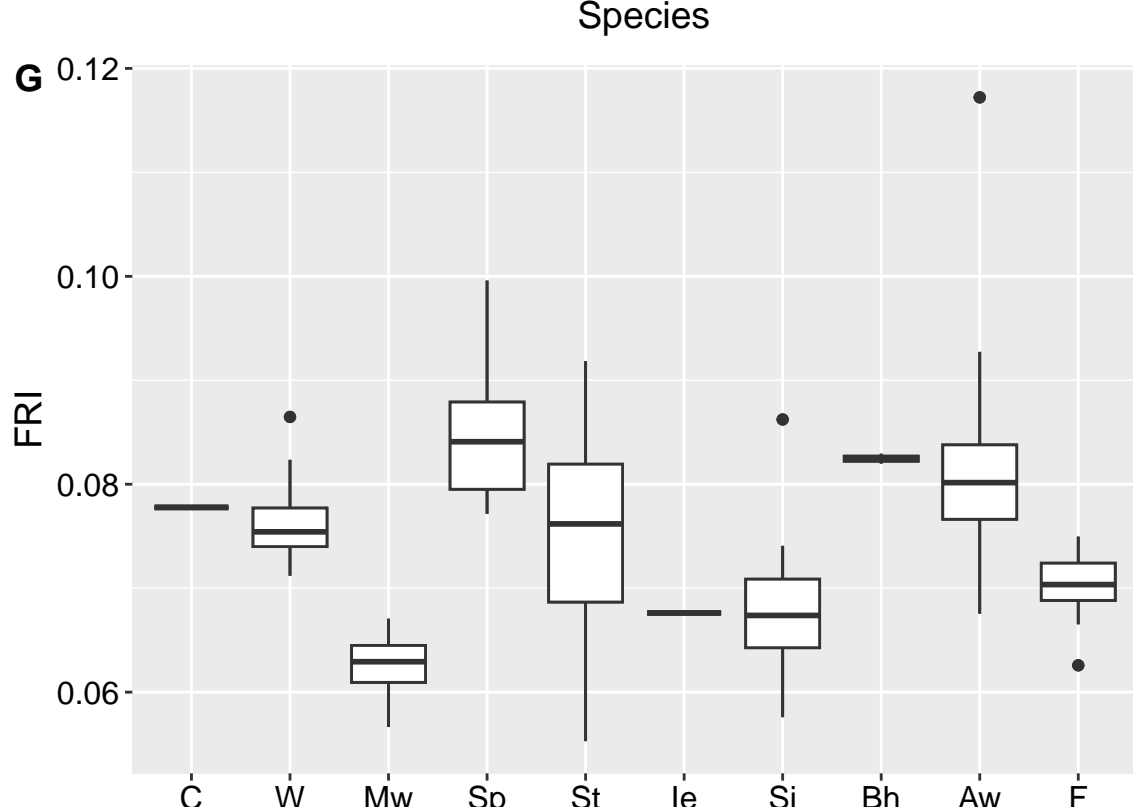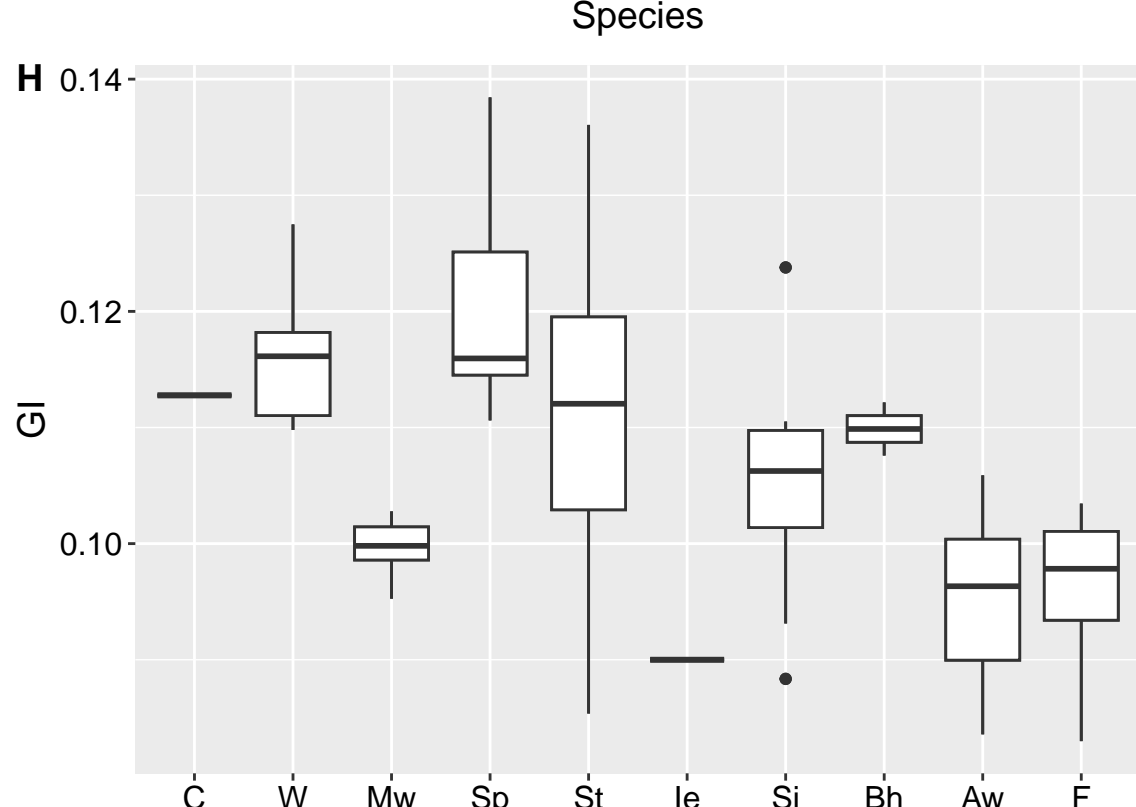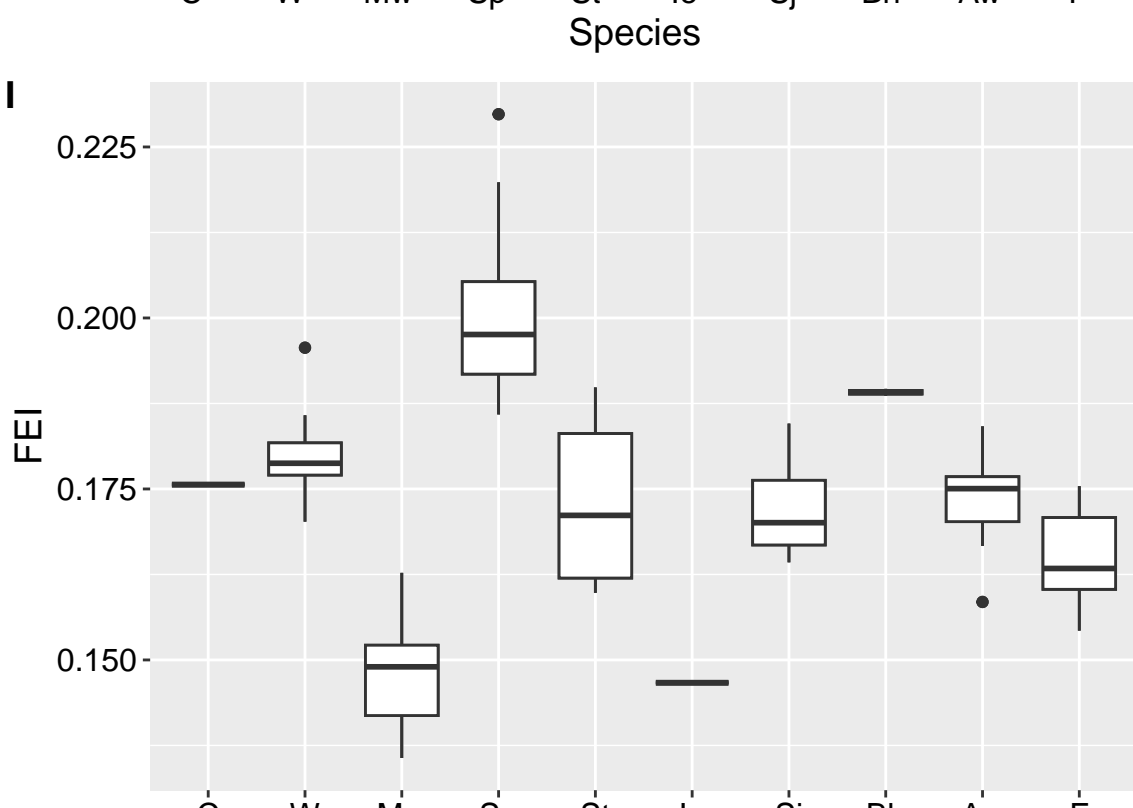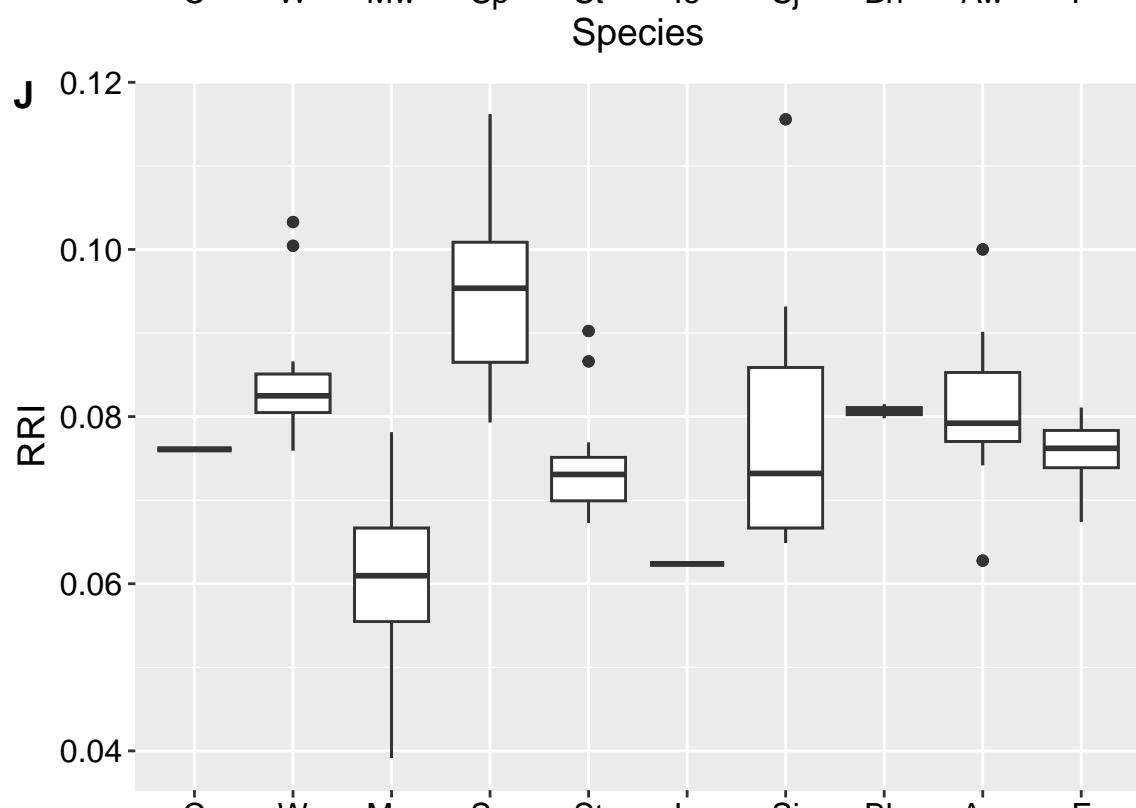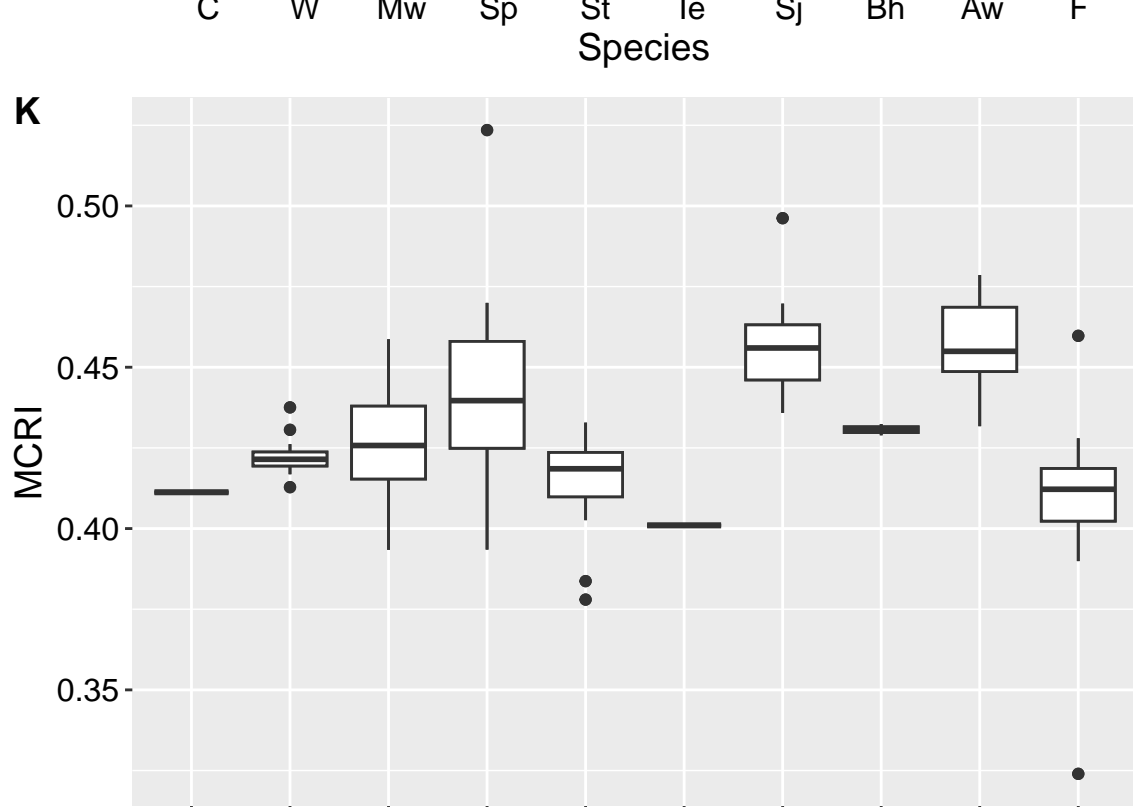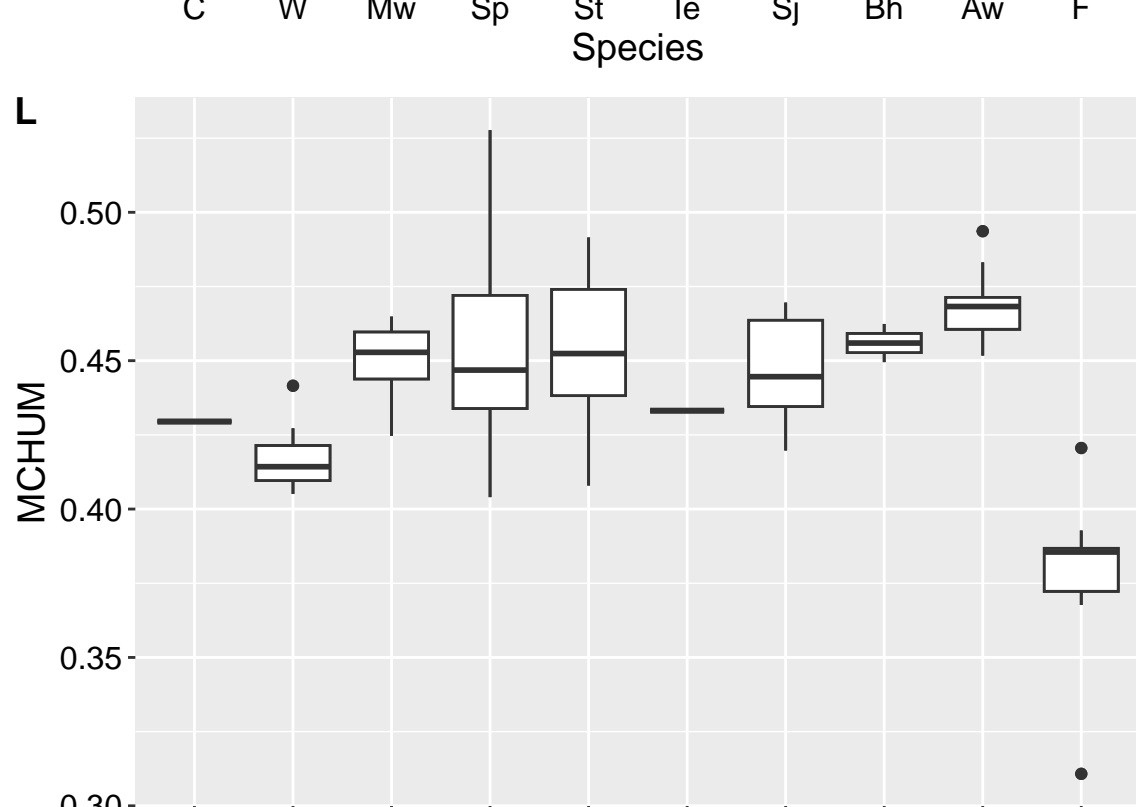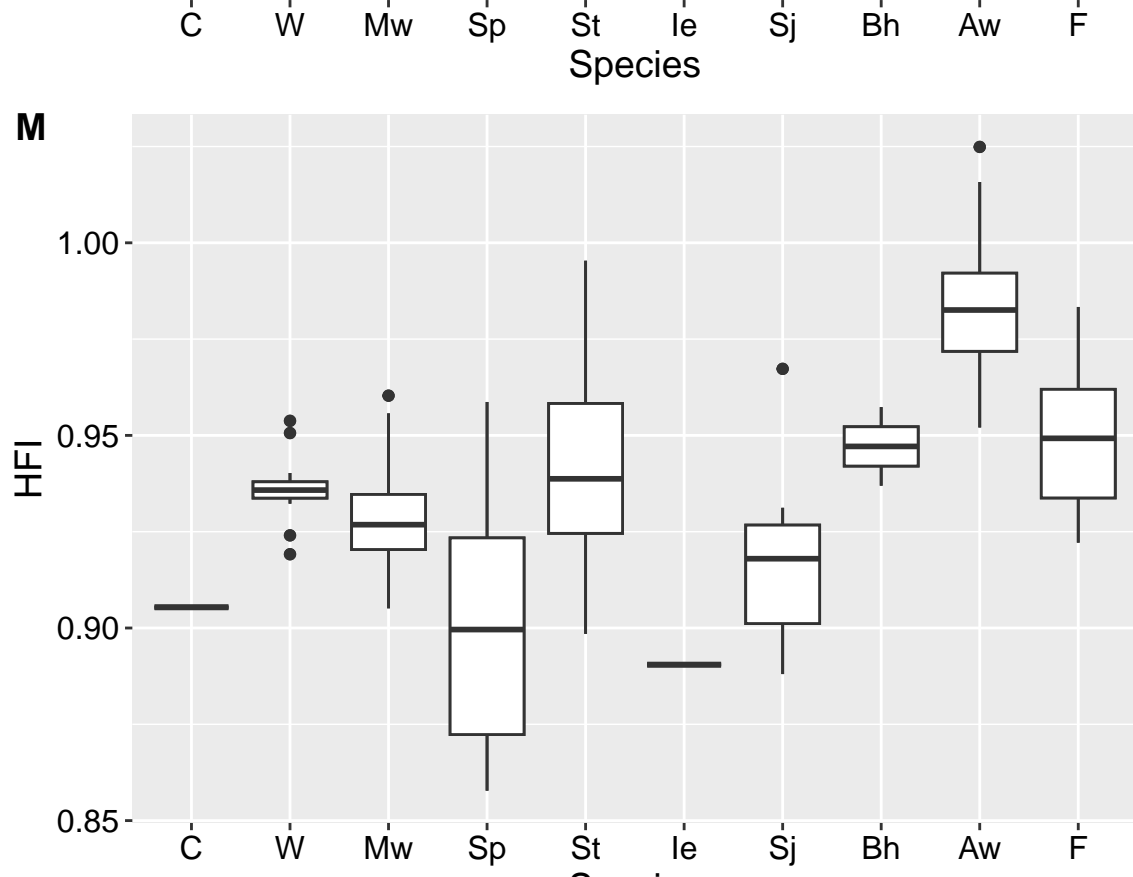

Supplement: FigS3_Boxplots.pdf [file FigS3_Boxplots.pdf]
