# Supplementary material for: A hyaena on stilts: comparison of the limb morphology of Ictitherium ebu (Mammalia: Hyaenidae) from the Late Miocene of Lothagam, Turkana Basin, Kenya with extant Canidae and Hyaenidae
Source: PeerJ journal article supplement (doi:10.7717/peerj.17405), 2024-06-10
Supplement: I_ebu_data_and_code.zip [file I_ebu_data_and_code.zip]

## Sheet: Indices
Specimen	Species	Family	Locomotion	Habitat	SMI	BI	HRI	OLI	URI	FRI	GI	FEI	HEI	RRI	MCRI	HFI	MCHUM
KNM-LT 23145	Ictitherium ebu	Ictitherium ebu	Ictitherium ebu	Ictitherium ebu	0.382353	1.08021	0.0705882	0.0817757	0.0462617	0.067619	0.09	0.146667	0.163636	0.0623762	0.40099	0.890476	0.433155
ZMB MAM 82368	Chrysocyon brachyurus	Canidae	Terrestrial	Open	0.292278	1.04633	0.0645937	0.0622378	0.0398601	0.0638376	0.1	0.142066	0.183784	0.0560886	0.416236	0.95572	0.435521
ZMB MAM 40121	Chrysocyon brachyurus	Canidae	Terrestrial	Open	0.331086	1.0824	0.0636704	0.0723127	0.0276873	0.0566434	0.0993007	0.135664	0.149813	0.0536332	0.421799	0.933566	0.456554
ZMB MAM 62102	Chrysocyon brachyurus	Canidae	Terrestrial	Open	0.350806	1.07661	0.0685484	0.0686833	0.0380783	0.0656934	0.0992701	0.140876	0.165323	0.0600825	0.412734	0.905109	0.444355
ZMB MAM 69005	Chrysocyon brachyurus	Canidae	Terrestrial	Open	0.335565	1.0795	0.060251	0.0773723	0.0343066	0.0606061	0.101894	0.143561	0.167364	0.0651163	0.393411	0.905303	0.424686
ZMB MAM 71528	Chrysocyon brachyurus	Canidae	Terrestrial	Open	0.344215	1.06612	0.0599174	0.0681159	0.0362319	0.0620155	0.10155	0.151938	0.173967	0.0391473	0.422093	0.937984	0.45
ZFMK MAM 1982-0344	Chrysocyon brachyurus	Canidae	Terrestrial	Open	0.350376	1.03383	0.0676692	0.0747541	0.0406557	0.0667832	0.101399	0.152797	0.174812	0.0483636	0.440727	0.93007	0.455639
ZFMK MAM 1997-0546	Chrysocyon brachyurus	Canidae	Terrestrial	Open	0.4075	1.05833	0.0633333	0.0907749	0.0394834	0.0640927	0.0965251	0.150193	0.170833	0.0681102	0.437008	0.926641	0.4625
ZFMK MAM 1997-0549	Chrysocyon brachyurus	Canidae	Terrestrial	Open	0.349174	1	0.0673554	0.0949458	0.0415162	0.0670635	0.102778	0.157937	0.190083	0.0677686	0.458678	0.960317	0.458678
ZFMK MAM 2006-0061	Chrysocyon brachyurus	Canidae	Terrestrial	Open	0.404938	1.07407	0.0670782	0.0765568	0.047619	0.0613636	0.100758	0.141288	0.177366	0.0662835	0.431801	0.920455	0.463786
ZFMK MAM 1989-0041	Chrysocyon brachyurus	Canidae	Terrestrial	Open	0.408299	1.09544	0.0626556	0.0669039	0.0455516	0.0609195	0.0965517	0.149808	0.20083	0.0564394	0.403788	0.923372	0.442324
SMF 45195	Chrysocyon brachyurus	Canidae	Terrestrial	Open	0.349587	1.08264	0.0694215	0.0758503	0.0401361	0.0638783	0.0996198	0.162738	0.17686	0.0618321	0.429389	0.920152	0.464876
SMF 97341	Chrysocyon brachyurus	Canidae	Terrestrial	Open	0.320866	1.00787	0.0606299	0.0782288	0.0476015	0.0609489	0.0952555	0.148175	0.161417	0.078125	0.445703	0.927007	0.449213
ZMB MAM 82516	Crocuta crocuta	Hyaenidae	Cursorial	Mixed	0.438426	1.07407	0.0819444	0.108642	0.0633745	0.0879032	0.115323	0.1875	0.236597	0.0793103	0.443103	0.870968	0.475926
ZMB MAM 82413	Crocuta crocuta	Hyaenidae	Cursorial	Mixed	0.509483	1.00431	0.0862069	0.118876	0.0799197	0.0921488	0.13843	0.219835	0.241379	0.100858	0.469957	0.958678	0.471983
ZMB MAM 82415	Crocuta crocuta	Hyaenidae	Cursorial	Mixed	0.511017	1.02119	0.0805085	0.146154	0.0595142	0.0840909	0.110606	0.205303	0.23178	0.116183	0.424896	0.893939	0.433898
ZMB MAM 16575	Crocuta crocuta	Hyaenidae	Cursorial	Mixed	0.44	0.991111	0.0551111	0.107692	0.0602564	0.0854839	0.114516	0.185887	0.220444	0.0865471	0.434529	0.907258	0.430667
ZMB MAM 82471	Crocuta crocuta	Hyaenidae	Cursorial	Mixed	0.499497	1.0804	0.0773869	0.137611	0.0548673	0.0771552	0.115948	0.196983	0.237186	0.0865116	0.423721	0.857759	0.457789
ZMB MAM 14818	Crocuta crocuta	Hyaenidae	Cursorial	Mixed	0.494146	0.97561	0.0814634	0.137642	0.0811321	0.0791489	0.125106	0.229787	0.277073	0.11	0.458	0.87234	0.446829
ZMB MAM 47517	Crocuta crocuta	Hyaenidae	Cursorial	Mixed	0.523144	1.0131	0.0960699	0.137613	0.0761317	0.0995968	0.135081	0.197581	0.251528	0.0978448	0.439655	0.923387	0.445415
ZMB MAM 7884	Crocuta crocuta	Hyaenidae	Cursorial	Mixed	0.499197	1.00803	0.0835341	0.132558	0.0542636	0.0820896	0.118284	0.191791	0.216867	0.0856574	0.523506	0.929104	0.527711
ZMB MAM 13295	Crocuta crocuta	Hyaenidae	Cursorial	Mixed	0.561161	1.02679	0.0802782	0.101667	0.05125	0.0795181	0.112851	0.202008	0.216518	0.095364	0.393478	0.899598	0.404018
ZMB MAM 82365	Hyaena hyaena	Hyaenidae	Cursorial	Open	0.552511	1.02283	0.0776837	0.123276	0.0625	0.0870833	0.1175	0.185417	0.223288	0.0866071	0.422768	0.9125	0.43242
ZMB MAM 82304	Hyaena hyaena	Hyaenidae	Cursorial	Open	0.436967	1.09479	0.0706161	0.0896266	0.0460581	0.0671171	0.0972973	0.162162	0.211374	0.0714286	0.402597	0.95045	0.440758
ZMB MAM 82359	Hyaena hyaena	Hyaenidae	Cursorial	Open	0.485279	1.12183	0.077665	0.0925764	0.0480349	0.076555	0.104785	0.159809	0.206091	0.0733032	0.423077	0.942584	0.474619
ZMB MAM 39312	Hyaena hyaena	Hyaenidae	Cursorial	Open	0.468224	1.0514	0.0831776	0.111207	0.0637069	0.0855814	0.125581	0.182326	0.240187	0.0768889	0.418667	0.995349	0.440187
ZMB MAM 82363	Hyaena hyaena	Hyaenidae	Cursorial	Open	0.40597	1.09453	0.0731343	0.0943723	0.047619	0.075814	0.111163	0.164651	0.200995	0.0672727	0.412273	0.934884	0.451244
MZUF 2137	Hyaena hyaena	Hyaenidae	Cursorial	Open	0.451546	1.12887	0.0701031	0.0841897	0.0434783	0.0688995	0.0937799	0.160287	0.196907	0.0675799	0.425114	0.92823	0.479897
MZUF 2138	Hyaena hyaena	Hyaenidae	Cursorial	Open	0.378836	1.12169	0.0724868	0.0767857	0.04375	0.0736585	0.0853659	0.168293	0.21164	0.0745283	0.418396	0.921951	0.469312
SMF 6729	Hyaena hyaena	Hyaenidae	Cursorial	Open	0.562567	1.09626	0.101604	0.115962	0.0661972	0.0918367	0.112245	0.17398	0.237968	0.0902439	0.432195	0.954082	0.473797
RMNH.MAM.35105	Hyaena hyaena	Hyaenidae	Cursorial	Open	0.477228	1.07921	0.0732673	0.0938865	0.050655	0.0552885	0.136058	0.187981	0.258911	0.0688073	0.377982	0.971154	0.407921
RMNH.MAM.35112	Hyaena hyaena	Hyaenidae	Cursorial	Open	0.479	1.105	0.079	0.082684	0.0493506	0.0805825	0.127184	0.179126	0.225	0.0728507	0.38371	0.970874	0.424
RMCA 37679	Hyaena hyaena	Hyaenidae	Cursorial	Open	0.521469	1.13559	0.0847458	0.0968037	0.0456621	0.0807107	0.11269	0.189848	0.242938	0.0736318	0.432836	0.898477	0.491525
RMCA 2161	Hyaena hyaena	Hyaenidae	Cursorial	Open	0.447393	1.08531	0.0687204	0.102101	0.0521008	0.0679825	0.111842	0.161404	0.201422	0.0703057	0.417904	0.925439	0.453555
ZMB MAM 7098	Proteles cristatus	Hyaenidae	Terrestrial	Open	0.350365	1.02847	0.0708029	0.0954133	0.0466318	0.0785268	0.0972898	0.184156	0.2	0.0901348	0.447126	0.95205	0.459854
ZFMK MAM 1962-0001	Proteles cristatus	Hyaenidae	Terrestrial	Open	0.458453	1.02077	0.0716417	0.0923277	0.0442133	0.0760028	0.08867	0.170303	0.189112	0.077193	0.453333	0.982407	0.462751
MZUF 2118	Proteles cristatus	Hyaenidae	Terrestrial	Open	0.349632	1.03148	0.0629605	0.089441	0.0409938	0.0675497	0.0860927	0.170199	0.170127	0.1	0.478571	0.988742	0.493637
SMF 15693	Proteles cristatus	Hyaenidae	Terrestrial	Open	0.435714	1.02429	0.065	0.0833333	0.0491803	0.0695461	0.0988287	0.17716	0.190714	0.0627615	0.456764	1.02489	0.467857
SMF 97297	Proteles cristatus	Hyaenidae	Terrestrial	Open	0.325019	0.991686	0.0733182	0.107914	0.0460432	0.0840841	0.0938438	0.175676	0.188209	0.0868902	0.47561	0.993243	0.471655
SMF 97380	Proteles cristatus	Hyaenidae	Terrestrial	Open	0.377947	1.0251	0.0730038	0.113537	0.0385735	0.0828852	0.103245	0.166667	0.212928	0.074184	0.440653	0.969764	0.451711
SMF 97379	Proteles cristatus	Hyaenidae	Terrestrial	Open	0.361194	1.02985	0.0791045	0.105042	0.0560224	0.0806916	0.0835735	0.175072	0.184328	0.0804348	0.455072	0.965418	0.468657
RMNH.MAM.35124	Proteles cristatus	Hyaenidae	Terrestrial	Open	0.348592	0.997183	0.0719718	0.0874425	0.0394477	0.0927336	0.105882	0.158478	0.178873	0.0769774	0.454802	0.982699	0.453521
RMCA 2147	Proteles cristatus	Hyaenidae	Terrestrial	Open	0.425	0.99527	0.0662162	0.0941558	0.0538961	0.0796156	0.100892	0.175017	0.181081	0.0794297	0.472505	1.01579	0.47027
ZMB MAM 89495	Proteles cristatus	Hyaenidae	Terrestrial	Open	0.371536	1.1191	0.082397	0.0855263	0.0513158	0.117216	0.0953687	0.18315	0.2	0.0789826	0.431727	0.978022	0.483146
ZFMK MAM 1983-0394	Parahyaena brunnea	Hyaenidae	Cursorial	Open	0.50297	1.06931	0.0816832	0.105286	0.0612335	0.0829384	0.107583	0.188626	0.270297	0.0814815	0.432407	0.957346	0.462376
ZMB MAM 7988	Parahyaena brunnea	Hyaenidae	Cursorial	Open	0.474519	1.04808	0.0802885	0.0952381	0.0528571	0.081982	0.112162	0.18964	0.241346	0.0798165	0.428899	0.936937	0.449519
MZUF 13354	Canis lupus	Canidae	Cursorial	Mixed	0.490722	0.943299	0.0603093	0.134171	0.0844221	0.0864734	0.111111	0.195652	0.226804	0.103279	0.430601	0.937198	0.406186
NRM 20135299	Canis lupus	Canidae	Cursorial	Mixed	0.378802	0.986175	0.0797235	0.112609	0.0647826	0.0775862	0.110776	0.185776	0.198157	0.0845794	0.426168	0.935345	0.420276
NRM 20135548	Canis lupus	Canidae	Cursorial	Mixed	0.399531	1.01408	0.0769953	0.107296	0.0613734	0.0780702	0.116667	0.177193	0.202817	0.0800926	0.421296	0.934211	0.42723
NRM 20135553	Canis lupus	Canidae	Cursorial	Mixed	0.407265	1.01282	0.0683761	0.111024	0.0629921	0.0737052	0.116335	0.181275	0.193162	0.0759494	0.419409	0.932271	0.424786
NRM 20145034	Canis lupus	Canidae	Cursorial	Mixed	0.413853	0.982684	0.0731602	0.110246	0.0581967	0.0711934	0.118519	0.176543	0.2	0.0845815	0.422907	0.950617	0.415584
NRM 20145028	Canis lupus	Canidae	Cursorial	Mixed	0.407306	1.00913	0.0753425	0.114831	0.0631356	0.0759494	0.119831	0.183122	0.194064	0.081448	0.437557	0.924051	0.441553
NRM 20125698	Canis lupus	Canidae	Cursorial	Mixed	0.394273	0.995595	0.0788546	0.110833	0.0654167	0.0823529	0.118067	0.178571	0.195595	0.0818584	0.412832	0.953782	0.411013
NRM 20155113	Canis lupus	Canidae	Cursorial	Mixed	0.399537	0.990741	0.0787037	0.108511	0.0565957	0.0748936	0.109787	0.170213	0.194444	0.0794393	0.416822	0.919149	0.412963
NRM 20155137	Canis lupus	Canidae	Cursorial	Mixed	0.419913	1	0.0800866	0.105906	0.0641732	0.0720648	0.110526	0.178947	0.199134	0.0831169	0.419481	0.935223	0.419481
NRM 20155145	Canis lupus	Canidae	Cursorial	Mixed	0.419068	0.970339	0.0762712	0.124498	0.0678715	0.0768924	0.12749	0.180478	0.197458	0.100437	0.422271	0.940239	0.409746
NRM 20155147	Canis lupus	Canidae	Cursorial	Mixed	0.394538	0.970588	0.0764706	0.1072	0.0652	0.0744094	0.112992	0.178346	0.194958	0.0865801	0.421645	0.937008	0.409244
NRM 20155153	Canis lupus	Canidae	Cursorial	Mixed	0.399149	0.965957	0.0723404	0.115574	0.0614754	0.0741036	0.115936	0.170916	0.195745	0.0806167	0.419383	0.936255	0.405106
MZUF 9827	Vulpes vulpes	Canidae	Cursorial	Mixed	0.334677	0.920968	0.0645161	0.106436	0.0511551	0.0705789	0.0919905	0.157018	0.158065	0.0674256	0.401051	0.983347	0.369355
RMNH.MAM.10900	Vulpes vulpes	Canidae	Cursorial	Mixed	0.363499	0.942685	0.0701357	0.107143	0.046131	0.0745297	0.101302	0.172938	0.173454	0.0784	0.4088	0.959479	0.38537
RMNH.MAM.9918	Vulpes vulpes	Canidae	Cursorial	Mixed	0.415575	0.959243	0.0684134	0.108868	0.0432588	0.0704722	0.10148	0.163495	0.168122	0.0682853	0.323976	0.968288	0.310771
RMNH.MAM.9858	Vulpes vulpes	Canidae	Cursorial	Mixed	0.391442	0.942948	0.0736926	0.112954	0.0671406	0.0749625	0.103448	0.175412	0.175119	0.0781513	0.389916	0.946027	0.36767
NRM 20005316	Vulpes vulpes	Canidae	Cursorial	Mixed	0.406754	0.914812	0.0636992	0.125194	0.0575428	0.0665251	0.0927105	0.154282	0.169609	0.0763423	0.459732	0.922151	0.420568
NRM 20035018	Vulpes vulpes	Canidae	Cursorial	Mixed	0.365024	0.945177	0.0624566	0.118493	0.0561644	0.0625806	0.0954839	0.159355	0.164469	0.0734214	0.415565	0.929677	0.392783
NRM 20085118	Vulpes vulpes	Canidae	Cursorial	Mixed	0.417922	0.938253	0.0730422	0.12406	0.0729323	0.0730136	0.0973515	0.172513	0.185241	0.0810594	0.4061	0.950608	0.381024
NRM 20155082	Vulpes vulpes	Canidae	Cursorial	Mixed	0.388626	0.924171	0.0695103	0.115204	0.0517241	0.0695461	0.100293	0.16325	0.172196	0.0760684	0.418803	0.926794	0.387046
NRM 895031	Vulpes vulpes	Canidae	Cursorial	Mixed	0.392909	0.922576	0.065123	0.114282	0.0524738	0.0685871	0.0829904	0.163237	0.181621	0.0752941	0.418039	0.947874	0.385673
NRM 730001	Vulpes vulpes	Canidae	Cursorial	Mixed	0.347921	0.901532	0.0649161	0.110189	0.0498113	0.0702247	0.0983146	0.16573	0.170678	0.079288	0.427994	0.962781	0.38585
RMCA 3921	Lupulella adusta	Canidae	Cursorial	Mixed	0.381436	0.986947	0.071066	0.102335	0.0480769	0.070998	0.110516	0.164769	0.190718	0.0771492	0.458486	0.923644	0.452502
RMCA 9329	Lupulella adusta	Canidae	Cursorial	Mixed	0.419118	0.995588	0.0647059	0.0974252	0.0410578	0.061089	0.110226	0.166667	0.185294	0.0664697	0.469719	0.903054	0.467647
RMCA 9330	Lupulella adusta	Canidae	Cursorial	Mixed	0.391691	1.01409	0.0682493	0.091712	0.0339674	0.0646937	0.105075	0.16724	0.191395	0.0673007	0.463058	0.927736	0.469585
RMCA 33283	Lupulella adusta	Canidae	Cursorial	Mixed	0.358653	0.956147	0.0767424	0.121933	0.059816	0.0862309	0.123783	0.176634	0.208301	0.0786241	0.438984	0.888039	0.419734
RMCA 18584	Lupulella adusta	Canidae	Cursorial	Mixed	0.370281	0.959036	0.064257	0.10514	0.0623053	0.0700074	0.103169	0.176861	0.2	0.115578	0.463149	0.917465	0.444177
RMCA 18583	Lupulella adusta	Canidae	Cursorial	Mixed	0.367733	1.03052	0.0581395	0.0987013	0.0402597	0.0575916	0.0883508	0.164267	0.181686	0.0648801	0.453456	0.900524	0.467297
RMCA 18766	Lupulella adusta	Canidae	Cursorial	Mixed	0.375676	1	0.0774775	0.0967742	0.0509338	0.0704698	0.0931208	0.184564	0.210811	0.0882883	0.445045	0.931208	0.445045
RMCA 17806	Lupulella adusta	Canidae	Cursorial	Mixed	0.445161	0.848387	0.0846774	0.111577	0.057047	0.0740741	0.108296	0.172593	0.193548	0.0931559	0.496198	0.918519	0.420968
RMCA 17190	Lupulella adusta	Canidae	Cursorial	Mixed	0.347767	0.996617	0.0635995	0.0962264	0.0440252	0.0641361	0.100785	0.167539	0.169824	0.0692464	0.435845	0.967277	0.434371
RMCA 17995	Lupulella adusta	Canidae	Cursorial	Mixed	0.413793	0.968801	0.0640394	0.114286	0.0349206	0.0647535	0.107432	0.175129	0.179803	0.0661017	0.449153	0.896247	0.43514
NRM 585750	Canis latrans	Canidae	Cursorial	Mixed	0.361489	1.04438	0.0751611	0.0922078	0.0512987	0.0777706	0.112767	0.175632	0.198998	0.0760795	0.411241	0.905379	0.429492
