# Supplementary material for: A hyaena on stilts: comparison of the limb morphology of Ictitherium ebu (Mammalia: Hyaenidae) from the Late Miocene of Lothagam, Turkana Basin, Kenya with extant Canidae and Hyaenidae
Source: PeerJ. 2024 Jun 10;12:e17405. doi: 10.7717/peerj.17405 (PMC11172688; doi:10.7717/peerj.17405)
Supplement: Supplemental Information 1 — The linear measurements sheet contains the raw data used to calculate indices for the linear analysis. The second sheet contains definitions of the measurement abbreviations. [file peerj-12-17405-s001.xlsx]

## Sheet: Linear measurements
Species	Specimen	HL	HMLD	DPCL	HEB	RL	RD	FUL	ULOL	UD	MC3L	FL	FAPD	FGT	FEB
I. ebu	KNM-LT 23145	18.7	1.32	7.15	3.06	20.2	1.26	21.4	1.75	0.99	8.1	21	1.42	1.89	3.08
C. brachyurus	ZMB MAM 82368	25.9	0.61	7.57	4.76	27.1	1.52	28.6	1.78	1.14	11.28	27.1	1.73	2.71	3.85
C. brachyurus	ZMB MAM 40121	26.7	1.7	8.84	4	28.9	1.55	30.7	2.22	0.85	12.19	28.6	1.62	2.84	3.88
C. brachyurus	ZMB MAM 62102	24.8	1.7	8.7	4.1	26.7	0.52	28.1	1.93	1.07	11.02	27.4	1.8	2.72	3.86
C. brachyurus	ZMB MAM 69005	23.9	1.44	8.02	4	25.8	1.68	27.4	2.12	0.94	10.15	26.4	1.6	2.69	3.79
C. brachyurus	ZMB MAM 71528	24.2	1.45	8.33	4.21	25.8	1.01	27.6	1.88	1	10.89	25.8	1.6	2.62	3.92
C. brachyurus	ZFMK MAM 1982-0344	26.6	1.8	9.32	4.65	27.5	1.33	30.5	2.28	1.24	12.12	28.6	1.91	2.9	4.37
C. brachyurus	ZFMK MAM 1997 0546	24	1.52	9.78	4.1	25.4	1.73	27.1	2.46	1.07	11.1	25.9	1.66	2.5	3.89
C. brachyurus	ZFMK MAM 1997 0549	24.2	1.63	8.45	4.6	24.2	1.64	27.7	2.63	1.15	11.1	25.2	1.69	2.59	3.98
C. brachyurus	ZFMK MAM 2006 0061	24.3	1.63	9.84	4.31	26.1	1.73	27.3	2.09	1.3	11.27	26.4	1.62	2.66	3.73
C. brachyurus	ZFMK MAM 1989-0041	24.1	1.51	9.84	4.84	26.4	1.49	28.1	1.88	1.28	10.66	26.1	1.59	2.52	3.91
C. brachyurus	SMF 45195	24.2	1.68	8.46	4.28	26.2	1.62	29.4	2.23	1.18	11.25	26.3	1.68	2.62	4.28
C. brachyurus	SMF 97341	25.4	1.54	8.15	4.1	25.6	2	27.1	2.12	1.29	11.41	27.4	1.67	2.61	4.06
C. crocuta	ZMB MAM 82516	21.6	1.77	9.47	2.26	23.2	1.84	24.3	2.64	1.54	10.28	24.8	2.18	2.86	4.65
C. crocuta	ZMB MAM 82413	23.2	2	11.82	5.6	23.3	2.35	24.9	2.96	1.99	10.95	24.2	2.23	3.35	5.32
C. crocuta	ZMB MAM 82415	23.6	1.9	12.06	5.47	24.1	2.8	24.7	3.61	1.47	10.24	26.4	2.22	2.92	5.42
C. crocuta	ZMB MAM 16575	22.5	1.24	9.9	4.96	22.3	1.93	23.4	2.52	1.41	9.69	24.8	2.12	2.84	4.61
C. crocuta	ZMB MAM 82471	19.9	1.54	9.94	4.72	21.5	1.86	22.6	3.11	1.24	9.11	23.2	1.79	2.69	4.57
C. crocuta	ZMB MAM 14818	20.5	1.67	10.13	5.68	20	2.2	21.2	2.918	1.72	9.16	23.5	1.86	2.94	5.4
C. crocuta	ZMB MAM 47517	22.9	2.2	11.98	5.76	23.2	2.27	24.3	3.344	1.85	10.2	24.8	2.47	3.35	4.9
C. crocuta	ZMB MAM 7884	24.9	2.08	12.43	5.4	25.1	2.15	25.8	3.42	1.4	13.14	26.8	2.2	3.17	5.14
C. crocuta	ZMB MAM 13295	22.4	0.71	12.57	4.85	23	1.24	24	2.44	1.23	9.05	24.9	1.98	2.81	5.03
C. latrans	NRM 585750	13.97	1.05	5.05	2.78	14.59	1.11	15.4	1.42	0.79	6	15.43	1.2	1.74	2.71
C. lupus	MZUF 13354	19.4	1.17	9.52	4.4	18.3	1.89	19.9	2.67	1.68	7.88	20.7	1.79	2.3	4.05
C. lupus	NRM 20135299	21.7	1.73	8.22	4.3	21.4	1.81	23	2.59	1.49	9.12	23.2	1.8	2.57	4.31
C. lupus	NRM 20135548	21.3	1.64	8.51	4.32	21.6	1.73	23.3	2.5	1.43	9.1	22.8	1.78	2.66	4.04
C. lupus	NRM 20135553	23.4	1.6	9.53	4.52	23.7	1.8	25.4	2.82	1.6	9.94	25.1	1.85	2.92	4.55
C. lupus	NRM 20145034	23.1	1.69	9.56	4.62	22.7	1.92	24.4	2.69	1.42	9.6	24.3	1.73	2.88	4.29
C. lupus	NRM 20145028	21.9	1.65	8.92	4.25	22.1	1.8	23.6	2.71	1.49	9.67	23.7	1.8	2.84	4.34
C. lupus	NRM 20125698	22.7	1.79	8.95	4.44	22.6	1.85	24	2.66	1.57	9.33	23.8	1.96	2.81	4.25
C. lupus	NRM 20155133	21.6	1.7	8.63	4.2	21.4	1.7	23.5	2.55	1.33	8.92	23.5	1.76	2.58	4
C. lupus	NRM 20155137	23.1	1.85	9.7	4.6	23.1	1.92	25.4	2.69	1.63	9.69	24.7	1.78	2.73	4.42
C. lupus	NRM 20155145	23.6	1.8	9.89	4.66	22.9	2.3	24.9	3.1	1.69	9.67	25.1	1.93	3.2	4.53
C. lupus	NRM 20155147	23.8	1.82	9.39	4.64	23.1	2	25	2.68	1.63	9.74	25.4	1.89	2.87	4.53
C. lupus	NRM 20155153	23.5	1.7	9.38	4.6	22.7	1.83	24.4	2.82	1.5	9.52	25.1	1.86	2.91	4.29
H. hyaena	ZMB MAM 82365	21.9		12.1	4.89	22.4	1.94	23.2	2.86	1.45	9.47	24	2.09	2.82	4.45
H. hyaena	ZMB MAM 82304	21.1	1.49	9.22	4.46	23.1	1.65	24.1	2.16	1.11	9.3	22.2	1.49	2.16	3.6
H. hyaena	ZMB MAM 82359	19.7	1.53	9.56	4.06	22.1	1.62	22.9	2.12	1.1	9.35	20.9	1.6	2.19	3.34
H. hyaena	ZMB MAM 39312	21.4	1.78	10.02	5.14	22.5	1.73	23.2	2.58	1.478	9.42	21.5	1.84	2.7	3.92
H. hyaena	ZMB MAM 82363	20.1	1.47	8.16	4.04	22	1.48	23.1	2.18	1.1	9.07	21.5	1.63	2.39	3.54
H. hyaena	MZUF 2137	19.4	1.36	8.76	3.82	21.9	1.48	25.3	2.13	1.1	9.31	20.9	1.44	1.96	3.35
H. hyaena	MZUF 2138	18.9	1.37	7.16	4	21.2	1.58	22.4	1.72	0.98	8.87	20.5	1.51	1.75	3.45
H. hyaena	SMF 6729	18.7	1.9	10.52	4.45	20.5	1.85	21.3	2.47	1.41	8.86	19.6	1.8	2.2	3.41
H. hyaena	RMNH.MAM.35105	20.2	1.48	9.64	5.23	21.8	1.5	22.9	2.15	1.16	8.24	20.8	1.15	2.83	3.91
H. hyaena	RMNH.MAM.35112	20	1.58	9.58	4.5	22.1	1.61	23.1	1.91	1.14	8.48	20.6	1.66	2.62	3.69
H. hyaena	RMCA 37679	17.7	1.5	9.23	4.3	20.1	1.48	21.9	2.12	1	8.7	19.7	1.59	2.22	3.74
H. hyaena	RMCA 2161	21.1	1.45	9.44	4.25	22.9	1.61	23.8	2.43	1.24	9.57	22.8	1.55	2.55	3.68
L. adusta	RMCA 3921	13.79	0.98	5.26	2.63	13.61	1.05	14.56	1.49	0.7	6.24	14.93	1.06	1.65	2.46
L. adusta	RMCA 9329	13.6	0.88	5.7	2.52	13.54	0.9	14.37	1.4	0.59	6.36	15.06	0.92	1.66	2.51
L. adusta	RMCA 9330	13.48	0.92	5.28	2.58	13.67	0.92	14.72	1.35	0.5	6.33	14.53	0.94	>1.63	2.43
L. adusta	RMCA 33283	12.77	0.98	4.58	2.66	12.21	0.96	13.04	1.59	0.78	5.36	14.38	1.24	1.78	2.54
L. adusta	RMCA 18584	12.45	0.8	4.61	2.49	11.94	1.38	12.84	1.35	0.8	5.53	13.57	0.95	1.4	2.4
L. adusta	RMCA 18583	13.76	0.8	5.06	2.5	14.18	0.92	15.4	1.52	0.62	6.43	15.28	0.88	1.35	2.51
L. adusta	RMCA 18766	11.1	0.86	4.17	2.34	11.1	0.98	11.78	1.14	0.6	4.94	11.92	0.84	1.11	2.2
L. adusta	RMCA 17806	12.4	1.05	5.52	2.4	10.52	0.98	11.92	1.33	0.68	5.22	13.5	1	1.462	2.33
L. adusta	RMCA 17190	14.78	0.94	5.14	2.51	14.73	1.02	15.9	1.53	0.7	6.42	15.28	0.98	1.54	2.56
L. adusta	RMCA 17795	12.18	0.78	5.04	2.19	11.8	0.78	12.6	1.44	0.44	5.3	13.59	0.88	1.46	2.38
P. brunnea	ZFMK MAM 1983-0394	20.2	1.65	10.16	5.46	21.6	1.76	22.7	2.39	1.39	9.34	21.1	1.75	2.27	3.98
P. brunnea	ZMB MAM 7988	20.8	1.67	9.87	5.02	21.8	1.74	21	2	1.11	9.35	22.2	1.82	2.49	4.21
P. cristatus	ZMB MAM 7098	13.7	0.97	4.8	2.74	14.09	1.27	>12.67	1.74	0.75	6.3	14.39	1.13	1.4	2.65
P. cristatus	ZFMK MAM 1962-0001	13.96	1.52	6.4	2.64	14.25	1.1	15.38	1.42	0.68	6.46	14.21	1.08	1.26	2.42
P. cristatus	MZUF 2118	14.93	0.94	5.22	2.54	15.4	1.54	16.1	1.44	0.66	7.37	15.1	1.02	1.3	2.57
P. cristatus	SMF 15693	14	0.91	6.1	2.67	14.34	0.9	14.64	1.22	0.72	6.55	13.66	0.95	1.35	2.42
P. cristatus	SMF 97297	13.23	0.97	4.3	2.49	13.12	1.14	13.9	1.5	0.64	6.24	13.32	1.12	1.25	2.34
P. cristatus	SMF 97380	13.15	0.96	4.97	2.8	13.48	1	13.74	1.56	0.53	5.94	13.56	2.28	1.4	2.26
P. cristatus	SMF 97379	13.4	1.06	4.84	2.47	13.8	1.11	14.28	1.5	0.8	6.28	13.88	1.12	1.16	2.43
P. cristatus	RMNH.MAM.35124	14.2	1.022	4.95	2.54	14.16	1.09	15.21	1.33	0.6	6.44	14.45	1.34	1.53	2.29
P. cristatus	RMCA 2147	14.8	0.98	6.29	2.68	14.73	1.17	15.4	1.45	0.83	6.96	14.57	1.16	1.47	2.55
P. cristatus	ZMB MAM 89495	13.35	1.1	4.96	2.67	14.94	1.18	15.2	1.3	0.78	6.45	13.65	1.6	0.33	2.5
V. vulpes	MZUF 9827	12.4	0.8	4.15	1.96	11.42	0.77	12.12	1.29	0.62	4.58	12.61	0.89	1.16	1.98
V. vulpes	RMNH.MAM.10900	13.26	0.93	4.82	2.3	12.5	0.98	13.44	1.44	0.62	5.11	13.82	1.03	1.4	2.39
V. vulpes	RMNH.MAM.9918	13.74	0.94	5.71	2.31	13.18	0.9	13.87	1.51	0.6	4.27	14.19	1	1.44	2.32
V. vulpes	RMNH.MAM.9858	12.62	0.93	4.94	2.21	11.9	0.93	12.66	1.43	0.85	4.64	13.34	1	1.38	2.34
V. vulpes	NRM 20005316	13.03	0.83	5.3	2.21	11.92	0.91	12.86	1.61	0.74	5.48	14.13	0.94	1.31	2.18
V. vulpes	NRM 20035018	14.41	0.9	5.26	2.37	13.62	1	14.6	1.73	0.82	5.66	15.5	0.97	1.48	2.47
V. vulpes	NRM 20085118	13.28	0.97	5.55	2.46	12.46	1.01	13.3	1.65	0.97	5.06	13.97	1.02	1.36	2.41
V. vulpes	NRM 20155082	12.66	0.88	4.92	2.18	11.7	0.89	12.76	1.47	0.66	4.9	13.66	0.95	1.37	2.23
V. vulpes	NRM 895031	13.82	0.9	5.43	2.51	12.75	0.96	13.34	0.58	0.7	5.33	14.58	1	1.21	2.38
V. vulpes	NRM 730001	13.71	0.89	4.77	2.34	12.36	0.98	13.25	1.46	0.66	5.29	14.24	1	1.4	2.36

## Sheet: Measurement definitions
Measurement	Description
HL	Greatest length of the humerus
HMLD	Midshaft mediolateral diameter of the humerus
DPCL	Length of the deltopectoral crest
HEB	Epicondylar breadth of the distal humerus
RL	Greatest length of the radius
RD	Midshaft mediolateral diameter of the radius
FUL	Functional length of the ulna
UMLD	Midshaft mediolateral diameter of the ulna
ULOL	Length of the olecranon process of the ulna
MC3L	Greatest length of metacarpal 3
FL	Greatest length of the femur
FAPD	Midshaft anteroposterior diameter of the femur
FGT	Height of the greater trochanter of the femur
FEB	Epicondylar breadth of the distal femur
