# Supplementary material for: A hyaena on stilts: comparison of the limb morphology of Ictitherium ebu (Mammalia: Hyaenidae) from the Late Miocene of Lothagam, Turkana Basin, Kenya with extant Canidae and Hyaenidae
Source: PeerJ. 2024 Jun 10;12:e17405. doi: 10.7717/peerj.17405 (PMC11172688; doi:10.7717/peerj.17405)
Supplement: Supplemental Information 2 — Indices derived from removed values were replaced by means of the same index for the same species in the index dataset. [file peerj-12-17405-s002.xlsx]

## Sheet: Corrections and Deletions
Specimen number	Species	Measurement	Error	Action
SMF 97380	Proteles cristatus	FAPD	Measurement/input	Removed
ZMB MAM 89495	Proteles cristatus	FGT	Measurement/input	Removed
ZMB MAM 82516	Crocuta crocuta	HEB	Measurement/input	Removed
ZMB MAM 82368	Chrysocyon brachyurus	HMLD	Measurement/input	Removed
ZMB MAM 13295	Crocuta crocuta	RD	Measurement/input	Removed
ZFMK MAM 1962-0001	Proteles cristatus	HMLD	Measurement/input	Removed
NRM 895031	Vulpes vulpes	ULOL	Measurement/input	Removed
ZMB MAM 62102	Chrysocyon brachyurus	RD	Measurement/input	Removed
ZMB MAM 13295	Crocuta crocuta	RD	Measurement/input	Removed
ZMB MAM 39312	Hyaena hyaena	FUL	Decimal place	Correction of typos
ZFMK MAM 1997-0549	Chrysocyon brachyurus	ULOL	Decimal place	Correction of typos
ZMB MAM 7098	Proteles cristatus	M3CL	Decimal place	Correction of typos

## Sheet: Measurement definitions
Measurement	Description
HMLD	Midshaft mediolateral diameter of the humerus
HEB	Epicondylar breadth of the distal humerus
RD	Midshaft mediolateral diameter of the radius
FUL	Functional length of the ulna
ULOL	Length of the olecranon process of the ulna
MC3L	Greatest length of metacarpal 3
FL	Greatest length of the femur
FAPD	Midshaft anteroposterior diameter of the femur
FGT	Height of the greater trochanter of the femur
