# Supplementary material for: A hyaena on stilts: comparison of the limb morphology of Ictitherium ebu (Mammalia: Hyaenidae) from the Late Miocene of Lothagam, Turkana Basin, Kenya with extant Canidae and Hyaenidae
Source: PeerJ. 2024 Jun 10;12:e17405. doi: 10.7717/peerj.17405 (PMC11172688; doi:10.7717/peerj.17405)
Supplement: Supplemental Information 4 — X-coordinates represented as X. Y-coordinates represented as Y. Numbers indicate the landmarks according to Andersson (2004) (Fig. 4). [file peerj-12-17405-s004.xlsx]

## Sheet: Sheet2
Species	Specimen	X1	Y1	X2	Y2	X3	Y3	X4	Y4	X5	Y5	X6	Y6
I.ebu	KNM-LT 23145	12.6996	19.0632	13.3031	18.606	14.6928	18.7889	13.9248	17.4083	13.4311	17.6094	12.4802	17.3534
C. latrans	NRM 585750	9.70815	9.9918	10.3669	9.85455	11.5564	9.9186	10.8153	8.784	10.3303	9.01275	9.65325	8.70165
Canis lupus	MZUF 13354	9.66928	8.48292	10.6505	8.2956	12.3631	8.10828	11.1232	6.39564	10.4275	6.81488	9.20544	6.48484
Canis lupus	NRM 20125698	9.18247	6.91202	10.0705	6.52752	11.7916	6.41765	10.8304	4.43102	9.75008	4.89792	8.55077	4.67821
Canis lupus	NRM 20135548	10.4841	8.80336	11.5016	8.73977	13.0824	8.7216	11.974	6.77741	11.22	7.07721	10.1479	6.6593
Canis lupus	NRM 20135553	12.301	10.2279	13.2642	10.0628	15.1355	9.91601	13.9705	7.87961	13.3009	8.27405	12.1451	7.99886
Canis lupus	NRM 20155113	12.4705	9.59129	13.1927	9.545	15.0165	9.58203	14.0722	7.66562	13.313	7.91559	12.3594	7.56379
Canis lupus	NRM 20155137	12.0689	7.69754	12.6687	7.44307	14.7862	7.52486	13.5684	5.41645	12.6778	5.76179	11.5236	5.40736
Canis lupus	NRM 20155145	10.6571	8.75901	11.3793	8.61087	13.5459	8.79605	12.7219	6.59241	11.8052	6.89795	10.5553	6.53685
Canis lupus	NRM 20155147	11.4703	9.77976	12.1883	9.55254	14.3334	9.66161	13.1881	7.57114	12.4428	7.91652	11.134	7.60749
Canis lupus	NRM 20155153	12.0612	8.74281	12.778	8.48619	14.7867	8.45964	13.6009	6.46862	12.9195	6.79603	11.8488	6.43322
Canis lupus	NRM 20145028	12.3001	11.5183	13.3365	11.3274	14.9547	11.2183	13.7365	9.38191	13.1183	9.70919	12.0001	9.35464
Canis lupus	NRM 20145034	13.1633	11.2369	13.8604	11.0168	15.8326	11.1085	14.6676	9.13631	14.0255	9.42067	12.833	9.12714
C. brachyurus	SMF 45195	13.982	7.73644	14.8729	7.64553	16.8093	7.99099	15.5002	6.15461	14.9547	6.37279	13.9638	5.86369
C. brachyurus	SMF 97341	15.66	9.24739	16.4398	9.10061	18.3297	9.36665	17.1554	7.64194	16.5682	7.92634	15.6417	7.54103
C. brachyurus	ZFMK MAM 1982-0344	15.359	6.18434	16.5348	5.78625	18.2383	5.92512	17.0625	3.95317	16.3033	4.32349	15.322	3.74949
C. brachyurus	ZFMK MAM 1989-0041	14.4504	6.32703	15.2557	6.11466	16.937	6.29164	15.9105	4.52184	15.1495	4.83155	14.2646	4.33601
C. brachyurus	ZFMK MAM 1997-0546	13.8644	6.57109	14.7114	6.47302	16.2539	6.70483	15.3623	4.99296	14.756	5.22478	13.8644	4.69873
C. brachyurus	ZFMK MAM 1997-0549	14.7426	6.89885	15.6141	6.70619	17.6599	7.1282	16.3939	5.17414	15.6417	5.47688	14.5775	4.90809
C. brachyurus	ZFMK MAM 2006-061	13.379	7.87107	14.2334	7.56205	15.7967	7.6802	15.3968	5.89876	14.4061	6.21688	13.4335	5.6988
C. brachyurus	ZMB MAM 62102	16.4253	6.1996	17.3515	6.09872	19.1032	6.47473	17.9843	4.59467	17.3974	4.83312	16.4253	4.29203
C. brachyurus	ZMB MAM 69005	14.4681	5.23469	15.3678	5.04384	17.0309	5.2983	15.8949	3.54432	15.3315	3.81696	14.4227	3.39891
C. brachyurus	ZMB MAM 71528	15.9186	9.45048	16.8412	9.29204	18.6493	9.53436	17.3445	7.70764	16.7574	7.9686	15.7974	7.46532
C. brachyurus	ZMB MAM 82368	13.17	7.81654	13.988	7.6802	15.8149	7.88016	14.6242	6.09872	13.9516	6.25323	12.9609	5.80787
C. crocuta	ZMB MAM 13295	14.2089	11.4834	15.3082	11.1655	17.6703	11.0383	16.2621	9.22127	15.3264	9.59376	13.7819	9.13951
C. crocuta	ZMB MAM 14818	12.0795	10.7872	13.1334	10.3106	15.8463	10.3198	14.3799	8.41347	13.3901	8.91754	11.6212	8.51428
C. crocuta	ZMB MAM 16575	10.1858	9.48332	10.9963	8.92495	13.4009	8.94296	11.996	7.12375	11.0143	7.56504	9.47431	7.0607
C. crocuta	ZMB MAM 47517	11.2836	7.71316	12.3102	7.45878	15.0538	7.54963	13.682	5.37832	12.5827	5.83257	10.7839	5.30564
C. crocuta	ZMB MAM 7884	12.5613	7.9614	13.3132	7.55448	15.9582	7.54564	14.6047	5.68798	13.6051	6.20105	11.8979	5.77644
C. crocuta	ZMB MAM 82413	12.6868	12.3597	13.8138	12.1779	16.7764	12.3779	15.2315	10.2513	14.1228	10.6239	12.3688	9.94227
C. crocuta	ZMB MAM 82415	13.6024	10.716	14.5557	10.3452	17.3362	9.87741	15.5885	8.20911	14.5557	8.79169	12.808	8.42978
C. crocuta	ZMB MAM 82471	9.55013	8.99969	10.3941	8.64191	12.7335	8.44925	11.2198	6.85298	10.4033	7.27498	8.94465	6.8438
C. crocuta	ZMB MAM 82516	14.4932	13.2261	15.4921	12.8284	18.4333	12.9948	17.0367	10.8398	15.9268	11.1358	14.2435	10.5716
H. hyaena	MZUF 2137	11.4176	9.40168	12.2472	9.08948	13.933	9.0538	12.7645	7.65336	12.1758	7.97448	11.0162	7.63552
H. hyaena	MZUF 2138	10.7342	11.0513	11.5736	10.7062	13.3082	10.6596	12.245	9.12083	11.5083	9.44724	10.4544	9.0742
H. hyaena	RMCA 2161	13.9888	9.71164	14.7017	9.34132	16.7385	9.23023	15.4979	7.62859	14.748	8.02669	13.4334	7.50824
H. hyaena	RMCA 37679	13.8055	10.4625	14.7253	10.4182	16.3437	10.5244	15.4947	9.01204	14.8137	9.39233	13.6286	8.95013
H. hyaena	RMNH.MAM.35112	11.5794	9.59798	12.2792	9.30714	13.9607	9.03447	12.7428	7.66203	12.1974	8.11648	10.4523	7.95287
H. hyaena	SMF 6729	15.939	13.419	16.704	13.005	18.351	12.942	17.298	11.466	16.668	11.889	15.048	11.61
H. hyaena	ZMB MAM 39312	12.1541	12.2993	12.971	12.0724	14.9861	12.1178	13.6518	10.3296	12.8893	10.7835	11.1919	10.0482
H. hyaena	ZMB MAM 82304	12.2274	10.5637	13.2183	10.1819	15.0365	9.87283	13.7092	8.40008	13.0456	8.95463	11.7274	8.691
H. hyaena	ZMB MAM 82359	11.9355	9.37984	12.5584	9.01344	14.4545	8.82108	13.1904	7.29136	12.5858	7.73104	11.3676	7.41044
H. hyaena	ZMB MAM 82363	14.2296	12.1496	15.1134	11.8104	16.881	11.8193	15.6847	10.2571	15.0956	10.5696	13.9083	10.15
H. hyaena	ZMB MAM 82365	12.1312	8.40264	13.2462	7.96556	15.4405	7.82284	13.9598	6.05668	13.157	6.45808	11.6406	5.99424
L. adusta	RMCA 17190	13.379	13.0245	13.9153	12.87	14.8151	12.8609	14.5424	11.8066	13.8425	11.9702	13.2245	11.7975
L. adusta	RMCA 17795	15.424	12.3156	15.8785	12.3156	16.851	12.461	16.342	11.4521	15.9966	11.543	15.4967	11.2885
L. adusta	RMCA 18583	15.3547	10.4547	15.7365	10.3274	16.9274	10.3456	16.182	9.42737	15.8365	9.58191	15.1911	9.32737
L. adusta	RMCA 18584	17.0033	11.3756	17.5124	11.2368	18.5213	11.2923	17.8918	10.3575	17.429	10.4778	16.8922	10.1353
L. adusta	RMCA 3921	7.67488	12.1465	8.23036	12.128	9.26726	12.2391	8.6192	11.1003	8.20259	11.2485	7.54527	10.9615
L. adusta	RMCA 9329	14.9259	11.4417	15.3269	11.2902	16.4052	11.3526	15.7903	10.3278	15.4517	10.4704	14.8457	10.2298
L. adusta	RMCA 9330	14.2767	12.0366	14.8434	11.9197	15.8599	12.0906	15.2392	11.0201	14.8794	11.1281	14.2227	10.8762
P. brunnea	ZFMK MAM 1983-0394	13.0776	11.2707	14.4371	10.9462	16.2877	11.0164	15.1475	9.30603	14.3581	9.65687	12.9109	9.18324
P. brunnea	ZMB MAM 7988	12.5625	9.57272	13.5591	9.08814	15.854	8.81385	14.2448	7.28697	13.4768	7.65269	11.8859	7.16811
P. cristatus	ZFMK MAM 1962-0001	12.9677	10.7925	13.5971	10.5889	14.68	10.5056	13.884	9.43186	13.4952	9.64475	12.6992	9.52442
P. cristatus	MZUF 2118	11.8569	11.246	12.4586	11.135	13.7081	11.1442	12.8381	10.015	12.3753	10.1631	11.644	9.92243
P. cristatus	RMCA 2147	15.3506	10.7399	15.9028	10.427	16.9703	10.427	16.3261	9.27662	15.8108	9.46068	15.0837	9.29503
P. cristatus	RMNH.MAM.35124	10.3887	13.6971	11.1249	13.4245	12.2156	13.279	11.3703	12.1793	11.0522	12.4247	10.2706	12.4065
P. cristatus	SMF 15693	14.5473	13.3846	15.0874	13.3114	16.1403	13.2015	15.4719	12.2036	15.1424	12.405	14.4557	12.2402
P. cristatus	SMF 97297	14.7202	12.6927	15.2664	12.5446	16.3404	12.489	15.7293	11.4429	15.3405	11.628	14.6832	11.4614
P. cristatus	SMF 97379	15.7785	14.8242	16.4329	14.7787	17.5327	14.6515	16.8056	13.6789	16.4238	13.9062	15.6513	13.788
P. cristatus	SMF 97380	15.1798	13.9395	15.874	13.921	16.9385	13.884	16.2535	12.8658	15.8648	13.0602	15.2076	12.8844
P. cristatus	ZMB MAM 7098	16.5497	14.5319	17.2532	14.3098	18.5398	14.2728	17.6975	13.162	17.1791	13.3842	16.4294	13.162
P. cristatus	ZMB MAM 89495	10.0665	14.2946	10.6693	14.0787	11.7758	14.0877	11.1101	12.9183	10.6783	13.0982	9.96757	12.8553
V. vulpes	MZUF 9827	13.1377	12.222	13.4647	12.1939	14.3991	12.3528	14.0534	11.5025	13.4927	11.5866	13.0536	11.4184
V. vulpes	NRM 20005316	12.4532	13.0423	12.8906	13.0334	13.7476	13.1048	13.1852	12.1229	12.8281	12.2746	12.2925	12.0693
V. vulpes	NRM 20035018	9.99639	10.3907	10.3357	10.3632	11.4454	10.5742	10.8126	9.43696	10.4549	9.5837	9.90468	9.26271
V. vulpes	NRM 20085118	8.9263	11.2932	9.26574	11.2106	10.4217	11.3207	9.73361	10.385	9.39418	10.5409	8.81621	10.3391
V. vulpes	NRM 20155082	9.80701	13.6784	10.1648	13.605	11.1739	13.7977	10.5593	12.8069	10.2474	12.9537	9.74279	12.6876
V. vulpes	NRM 730001	15.5349	9.42464	15.8404	9.3691	16.8866	9.49871	16.2385	8.4433	15.9238	8.6192	15.3405	8.35072
V. vulpes	NRM 895031	9.63758	11.6558	10.1653	11.5447	11.1929	11.6188	10.5078	10.5912	10.1838	10.7763	9.6098	10.5634
V. vulpes	RMNH.MAM.10900	14.785	14.211	15.1461	14.2203	16.2756	14.3221	15.5905	13.313	15.2109	13.4704	14.6554	13.2019
V. vulpes	RMNH.MAM.9918	15.285	13.026	15.5257	12.9705	16.6274	13.1093	16.146	12.0447	15.8127	12.165	15.2572	11.8873
