# Supplementary material for: A hyaena on stilts: comparison of the limb morphology of Ictitherium ebu (Mammalia: Hyaenidae) from the Late Miocene of Lothagam, Turkana Basin, Kenya with extant Canidae and Hyaenidae
Source: PeerJ. 2024 Jun 10;12:e17405. doi: 10.7717/peerj.17405 (PMC11172688; doi:10.7717/peerj.17405)
Supplement: Supplemental Information 5 — W is the test-statistic, p is the significance. Index definitions are included in a separate sheet. [file peerj-12-17405-s005.xlsx]

## Sheet: Linear morphometrics
Table S5A. Shapiro-Wilks normality tests of the linear morphometrics and truss ratios.
W is the test-statistic, p is the significance.
Index	W	p-value
SMI	0.95544	0.007651
BI	0.98481	0.4726
HRI	0.96742	0.04098
OLI	0.98697	0.6053
URI	0.97646	0.1519
FRI	0.95139	0.004455
GI	0.97871	0.2094
FEI	0.97764	0.18
HEI	0.94867	0.003119
RRI	0.97095	0.06832
MCRI	0.95389	0.006207
HFI	0.98832	0.6935
MCHUM	0.96184	0.01849

## Sheet: Truss analysis
Table S5B. Shapiro-Wilks normality tests of the linear morphometrics and truss ratios.
W is the test-statistic, p is the significance.
Distance	W	p-value
2.6	0.90903	7.176e-05
2.5	0.94923	0.005679
3.5	0.90948	7.498e-05
1.5	0.94878	0.005374
2.4	0.93687	0.001323
5.6	0.93269	0.0008279
4.5	0.94037	0.001976
3.4	0.89055	1.306e-05
2.3	0.93136	0.0007147
1.2	0.9861	0.614
1.6	0.91387	0.0001153

## Sheet: Index descriptions
Index	Descriptions of the indices
Shoulder moment index (SMI)	Deltopectoral crest length divided by functional length of the humerus (DPCL/HL). Indicates mechanical advantage of the deltoid and pectoral muscles acting across the shoulder joint.
Brachial index (BI)	Functional length of the radius divided by functional length of the humerus (RL/HL). Indicates relative proportions of proximal and distal elements of the forelimb.
Humeral robustness index (HRI)	Mediolateral diameter of humerus divided by functional length of the humerus (HMLD/HL). Indicates robustness of the humerus and its ability to resist bending and shearing stresses.
Humeral epicondylar index (HEI)	Epicondylar breadth of humerus divided by functional length of the humerus (HEB/HL). Indicates relative area available for the origins of the forearm flexors, pronators, and supinators.
Olecranon length index (OLI)	Olecranon process length divided by functional length of the ulna (ULOL/FUL). Indicates relative mechanical advantage of the triceps brachii and dorsoepitrochlearis muscles used in elbow extension. This is identical to the index of fossorial ability used by Hildebrand (1985).
Ulnar robustness index (URI)	Mediolateral diameter of ulna divided by functional length of the ulna (UMLD/FUL). Indicates robustness of the ulna and its ability to resist bending and shearing stresses, and relative area available for the origin and insertion of forearm and manus flexors, pronators, and supinators.
Femoral robustness index (FRI)	Anteroposterior diameter of femur divided by functional length of the femur (FAPD/FL). Indicates robustness of the femur and its ability to resist bending and shearing stresses (AP diameter is used due to transverse expansion of the femora in semiaquatic rodents).
Gluteal index (GI)	Length of distal extension of the greater trochanter of the femur divided by functional length of the femur (FGT/FL). Indicates relative mechanical advantage of the gluteal muscles used in retraction of the femur.
Femoral epicondylar index (FEI)	Epicondylar breadth of femur divided by the functional length of the femur (FEB/FL). Indicates relative area available for the origins of the gastrocnemius and soleus muscles used in extension of the knee and plantar-flexion of the pes.
Radial robustness index (RRI)	Greatest length of the radius divided by the midshaft mediolateral diameter of the radius (RD/RL). Indicates robustness of the radius and its ability to resist bending and shearing stresses.
Metacarpal radial index (MCRI)	Greatest length of metacarpal 3 divided by the functional length of the radius (MC3L/RL). Indicates relative proportions of the third metacarpal compared to the radius.
Metacarpal humeral index (MCHUM)	Greatest length of metacarpal 3 divided by the functional length of the humerus (MC3L/HL). Indicates relative proportions of the third metacarpal compared to the length of the humerus.
Humeral femoral index (HFI)	Functional length of the radius divided by the functional length of the femur(HL/FL). Indicates relative proportions of the humerus compared to the femur.
