# Supplementary material for: A hyaena on stilts: comparison of the limb morphology of Ictitherium ebu (Mammalia: Hyaenidae) from the Late Miocene of Lothagam, Turkana Basin, Kenya with extant Canidae and Hyaenidae
Source: PeerJ. 2024 Jun 10;12:e17405. doi: 10.7717/peerj.17405 (PMC11172688; doi:10.7717/peerj.17405)
Supplement: Supplemental Information 6 — A lower goodness of fit value corresponds to the data being more monotonic to the original distances (Legendre & Legendre, 1998). [file peerj-12-17405-s006.xlsx]

## Sheet: Linear goodness of fit
Table S6A. Goodness of fit values for every specimen of the NMDS of the linear morphometrics.
A lower goodness of fit value corresponds to the data being more monotonic to the original distances (Legendre & Legendre, 1998).
Specimen	Species	Goodness of fit
KNM-LT 23145	Ictitherium ebu	0.02
ZMB MAM 82368	Chrysocyon brachyurus	0.01
ZMB MAM 40121	Chrysocyon brachyurus	0.01
ZMB MAM 62102	Chrysocyon brachyurus	0.01
ZMB MAM 69005	Chrysocyon brachyurus	0.02
ZMB MAM 71528	Chrysocyon brachyurus	0.01
ZFMK MAM 1982-0344	Chrysocyon brachyurus	0.01
ZFMK MAM 1997-0546	Chrysocyon brachyurus	0.01
ZFMK MAM 1997-0549	Chrysocyon brachyurus	0.01
ZFMK MAM 2006-0061	Chrysocyon brachyurus	0.01
ZFMK MAM 1989-0041	Chrysocyon brachyurus	0.01
SMF 45195	Chrysocyon brachyurus	0.01
SMF 97341	Chrysocyon brachyurus	0.01
ZMB MAM 82516	Crocuta crocuta	0.02
ZMB MAM 82413	Crocuta crocuta	0.01
ZMB MAM 82415	Crocuta crocuta	0.02
ZMB MAM 16575	Crocuta crocuta	0.01
ZMB MAM 82471	Crocuta crocuta	0.02
ZMB MAM 14818	Crocuta crocuta	0.02
ZMB MAM 47517	Crocuta crocuta	0.01
ZMB MAM 7884	Crocuta crocuta	0.03
ZMB MAM 13295	Crocuta crocuta	0.02
ZMB MAM 82365	Hyaena hyaena	0.01
ZMB MAM 82304	Hyaena hyaena	0.01
ZMB MAM 82359	Hyaena hyaena	0.01
ZMB MAM 39312	Hyaena hyaena	0.02
ZMB MAM 82363	Hyaena hyaena	0.01
MZUF 2137	Hyaena hyaena	0.01
MZUF 2138	Hyaena hyaena	0.01
SMF 6729	Hyaena hyaena	0.01
RMNH.MAM.35105	Hyaena hyaena	0.02
RMNH.MAM.35112	Hyaena hyaena	0.02
RMCA 37679	Hyaena hyaena	0.01
RMCA 2161	Hyaena hyaena	0.01
ZMB MAM 7098	Proteles cristatus	0.01
ZFMK MAM 1962-0001	Proteles cristatus	0.02
MZUF 2118	Proteles cristatus	0.02
SMF 15693	Proteles cristatus	0.03
SMF 97297	Proteles cristatus	0.02
SMF 97380	Proteles cristatus	0.01
SMF 97379	Proteles cristatus	0.01
RMNH.MAM.35124	Proteles cristatus	0.01
RMCA 2147	Proteles cristatus	0.03
ZMB MAM 89495	Proteles cristatus	0.02
ZFMK MAM 1983-0394	Parahyaena brunnea	0.01
ZMB MAM 7988	Parahyaena brunnea	0.01
MZUF 13354	Canis lupus	0.01
NRM 20135299	Canis lupus	0.01
NRM 20135548	Canis lupus	0.01
NRM 20135553	Canis lupus	0.01
NRM 20145034	Canis lupus	0.01
NRM 20145028	Canis lupus	0.01
NRM 20125698	Canis lupus	0.01
NRM 20155113	Canis lupus	0.01
NRM 20155137	Canis lupus	0.01
NRM 20155145	Canis lupus	0.01
NRM 20155147	Canis lupus	0.01
NRM 20155153	Canis lupus	0.01
MZUF 9827	Vulpes vulpes	0.01
RMNH.MAM.10900	Vulpes vulpes	0.01
RMNH.MAM.9918	Vulpes vulpes	0.03
RMNH.MAM.9858	Vulpes vulpes	0.02
NRM 20005316	Vulpes vulpes	0.01
NRM 20035018	Vulpes vulpes	0.01
NRM 20085118	Vulpes vulpes	0.01
NRM 20155082	Vulpes vulpes	0.01
NRM 895031	Vulpes vulpes	0.01
NRM 730001	Vulpes vulpes	0.01
RMCA 3921	Lupulella adusta	0.01
RMCA 9329	Lupulella adusta	0.02
RMCA 9330	Lupulella adusta	0.01
RMCA 33283	Lupulella adusta	0.02
RMCA 18584	Lupulella adusta	0.02
RMCA 18583	Lupulella adusta	0.01
RMCA 18766	Lupulella adusta	0.01
RMCA 17806	Lupulella adusta	0.02
RMCA 17190	Lupulella adusta	0.01
RMCA 17995	Lupulella adusta	0.02
NRM 585750	Canis latrans	0.01

## Sheet: Truss goodness of fit
Table S6B. Goodness of fit values for every specimen of the NMDS of the truss analysis.
A lower goodness of fit value corresponds to the data being more monotonic to the original distances (Legendre & Legendre, 1998).
Specimen	Species	Goodness of fit
KNM-LT 23145	Ictitherium ebu	0.003
NRM 585750	Canis latrans	0.003
MZUF 13354	Canis lupus	0.004
NRM 20125698	Canis lupus	0.01
NRM 20135548	Canis lupus	0.005
NRM 20135553	Canis lupus	0.004
NRM 20155113	Canis lupus	0.004
NRM 20155137	Canis lupus	0.004
NRM 20155145	Canis lupus	0.005
NRM 20155147	Canis lupus	0.004
NRM 20155153	Canis lupus	0.004
NRM 20145028	Canis lupus	0.005
NRM 20145034	Canis lupus	0.004
SMF 45195	Chrysocyon brachyurus	0.01
SMF 97341	Chrysocyon brachyurus	0.005
ZFMK MAM 19820344	Chrysocyon brachyurus	0.01
ZFMK MAM 19890041	Chrysocyon brachyurus	0.002
ZFMK MAM 19970546	Chrysocyon brachyurus	0.003
ZFMK MAM 19970549	Chrysocyon brachyurus	0.01
ZFMK MAM 2006061	Chrysocyon brachyurus	0.01
ZMB MAM 62102	Chrysocyon brachyurus	0.003
ZMB MAM 69005	Chrysocyon brachyurus	0.003
ZMB MAM 71528	Chrysocyon brachyurus	0.004
ZMB MAM 82368	Chrysocyon brachyurus	0.003
ZMB MAM 13295	Crocuta crocuta	0.002
ZMB MAM 14818	Crocuta crocuta	0.003
ZMB MAM 16575	Crocuta crocuta	0.003
ZMB MAM 47517	Crocuta crocuta	0.002
ZMB MAM 7884	Crocuta crocuta	0.005
ZMB MAM 82413	Crocuta crocuta	0.002
ZMB MAM 82415	Crocuta crocuta	0.002
ZMB MAM 82471	Crocuta crocuta	0.003
ZMB MAM 82516	Crocuta crocuta	0.002
MZUF 2137	Hyaena hyaena	0.002
MZUF 2138	Hyaena hyaena	0.003
RMCA 2161	Hyaena hyaena	0.004
RMCA 37679	Hyaena hyaena	0.002
RMNH.MAM.35112	Hyaena hyaena	0.005
SMF 6729	Hyaena hyaena	0.004
ZMB MAM 39312	Hyaena hyaena	0.01
ZMB MAM 82304	Hyaena hyaena	0.004
ZMB MAM 82359	Hyaena hyaena	0.004
ZMB MAM 82363	Hyaena hyaena	0.003
ZMB MAM 82365	Hyaena hyaena	0.004
RMCA 17190	Lupulella adusta	0.002
RMCA 17795	Lupulella adusta	0.003
RMCA 18583	Lupulella adusta	0.002
RMCA 18584	Lupulella adusta	0.002
RMCA 3921	Lupulella adusta	0.002
RMCA 9329	Lupulella adusta	0.002
RMCA 9330	Lupulella adusta	0.002
ZFMK MAM 1983-0394	Parahyaena brunnea	0.01
ZMB MAM 7988	Parahyaena brunnea	0.004
ZFMK MAM 1962-0001	Proteles cristatus	0.002
MZUF 2118	Proteles cristatus	0.003
RMCA 2147	Proteles cristatus	0.002
RMNH.MAM.35124	Proteles cristatus	0.002
SMF 15693	Proteles cristatus	0.002
SMF 97297	Proteles cristatus	0.002
SMF 97379	Proteles cristatus	0.002
SMF 97380	Proteles cristatus	0.002
ZMB MAM 7098	Proteles cristatus	0.003
ZMB MAM 89495	Proteles cristatus	0.002
MZUF 9827	Vulpes vulpes	0.002
NRM 20005316	Vulpes vulpes	0.002
NRM 20035018	Vulpes vulpes	0.002
NRM 20085118	Vulpes vulpes	0.002
NRM 20155082	Vulpes vulpes	0.002
NRM 730001	Vulpes vulpes	0.002
NRM 895031	Vulpes vulpes	0.002
RMNH.MAM.10900	Vulpes vulpes	0.002
RMNH.MAM.9918	Vulpes vulpes	0.002
