# Supplementary material for: A hyaena on stilts: comparison of the limb morphology of Ictitherium ebu (Mammalia: Hyaenidae) from the Late Miocene of Lothagam, Turkana Basin, Kenya with extant Canidae and Hyaenidae
Source: PeerJ. 2024 Jun 10;12:e17405. doi: 10.7717/peerj.17405 (PMC11172688; doi:10.7717/peerj.17405)
Supplement: Supplemental Information 7 — The “overall” p and F values represent the values of the original model, while the “diff” p and F values compare the model with the new variable with the model excluding it (Weihs et al., 2005). Index definitions are included in a separate sheet. [file peerj-12-17405-s007.xlsx]

## Sheet: Species
Table S7A. The indices selected for determining variables for the stepwise analysis of species.
The “overall” p and F values represent the values of the original model, while the “diff” p and F values compare the model with the new variable with the model excluding it (Weihs et al., 2005).
	vars	Wilks.lambda	F.statistics.overall	p.value.overall	F.statistics.diff	p.value.diff
1	FEI	0.261058	32.0797	5.18086e-18	32.0797	5.18086e-18
2	BI	0.0702086	30.9766	6.96732e-33	30.3546	0
3	HFI	0.0304645	25.3297	9.58552e-41	14.3506	1.91925e-10
4	MCRI	0.0151226	22.0857	1.25561e-46	10.9905	1.86135e-08
5	GI	0.00869297	19.5648	1.96204e-50	7.8894	2.11096e-06
6	OLI	0.00567063	17.4439	1.63765e-52	5.59631	0.000102536
7	MCHUM	0.00397899	15.7558	1.26436e-53	4.39315	0.00090659
8	URI	0.00292624	14.4049	3.90039e-54	3.65757	0.0035787
9	HEI	0.00226327	13.2381	5.0368e-54	2.92928	0.0141081
10	FRI	0.00178212	12.2912	1.04049e-53	2.65483	0.0237526

## Sheet: Family
Table S7B. The indices selected for determining variables for the stepwise analysis of family.
The “overall” p and F values represent the values of the original model, while the “diff” p and F values compare the model with the new variable with the model excluding it (Weihs et al., 2005).
	vars	Wilks.lambda	F.statistics.overall	p.value.overall	F.statistics.diff	p.value.diff
1	HEI	0.635374	41.8929	9.74706e-09	41.8929	9.74706e-09
2	MCHUM	0.501505	35.784	1.62143e-11	19.2194	3.84436e-05
3	HFI	0.39119	36.8325	1.8109e-14	20.0218	2.80417e-05
4	GI	0.35654	31.5829	4.9571e-15	6.80298	0.0110874
5	SMI	0.315971	29.8748	5.07175e-16	8.85904	0.00400203
6	FRI	0.292651	27.3931	2.31624e-16	5.41864	0.0228619
7	URI	0.242844	29.8425	2.90183e-18	13.7417	0.000423497

## Sheet: Locomotion
Table S7C. The indices selected for determining variables for the stepwise analysis of locomotion.
The “overall” p and F values represent the values of the original model, while the “diff” p and F values compare the model with the new variable with the model excluding it (Weihs et al., 2005).
	vars	Wilks.lambda	F.statistics.overall	p.value.overall	F.statistics.diff	p.value.diff
1	OLI	0.601115	48.4411	1.23587e-09	48.4411	1.23587e-09
2	MCRI	0.524239	32.671	7.99932e-11	10.5583	0.00175022
3	HFI	0.485904	25.0398	3.6788e-11	5.60143	0.0206377

## Sheet: Habitat
Table S7D. The indices selected for determining variables for the stepwise analysis of habitat.
The “overall” p and F values represent the values of the original model, while the “diff” p and F values compare the model with the new variable with the model excluding it (Weihs et al., 2005).
	vars	Wilks.lambda	F.statistics.overall	p.value.overall	F.statistics.diff	p.value.diff
1	BI	0.518173	67.8797	5.00773e-12	67.8797	5.00773e-12
2	HFI	0.346628	67.8576	2.7234e-17	35.6323	7.91518e-08
3	FEI	0.272143	63.2975	5.01919e-20	19.4327	3.57092e-05
4	MCRI	0.24985	52.5419	2.26074e-20	6.24561	0.0147648
5	MCHUM	0.229725	46.2718	1.00781e-20	6.04478	0.0164238

## Sheet: Index definitions
Index	Descriptions of the indices
Shoulder moment index (SMI)	Deltopectoral crest length divided by functional length of the humerus (DPCL/HL). Indicates mechanical advantage of the deltoid and pectoral muscles acting across the shoulder joint.
Brachial index (BI)	Functional length of the radius divided by functional length of the humerus (RL/HL). Indicates relative proportions of proximal and distal elements of the forelimb.
Humeral robustness index (HRI)	Mediolateral diameter of humerus divided by functional length of the humerus (HMLD/HL). Indicates robustness of the humerus and its ability to resist bending and shearing stresses.
Humeral epicondylar index (HEI)	Epicondylar breadth of humerus divided by functional length of the humerus (HEB/HL). Indicates relative area available for the origins of the forearm flexors, pronators, and supinators.
Olecranon length index (OLI)	Olecranon process length divided by functional length of the ulna (ULOL/FUL). Indicates relative mechanical advantage of the triceps brachii and dorsoepitrochlearis muscles used in elbow extension. This is identical to the index of fossorial ability used by Hildebrand (1985).
Ulnar robustness index (URI)	Mediolateral diameter of ulna divided by functional length of the ulna (UMLD/FUL). Indicates robustness of the ulna and its ability to resist bending and shearing stresses, and relative area available for the origin and insertion of forearm and manus flexors, pronators, and supinators.
Femoral robustness index (FRI)	Anteroposterior diameter of femur divided by functional length of the femur (FAPD/FL). Indicates robustness of the femur and its ability to resist bending and shearing stresses (AP diameter is used due to transverse expansion of the femora in semiaquatic rodents).
Gluteal index (GI)	Length of distal extension of the greater trochanter of the femur divided by functional length of the femur (FGT/FL). Indicates relative mechanical advantage of the gluteal muscles used in retraction of the femur.
Femoral epicondylar index (FEI)	Epicondylar breadth of femur divided by the functional length of the femur (FEB/FL). Indicates relative area available for the origins of the gastrocnemius and soleus muscles used in extension of the knee and plantar-flexion of the pes.
Radial robustness index (RRI)	Greatest length of the radius divided by the midshaft mediolateral diameter of the radius (RD/RL). Indicates robustness of the radius and its ability to resist bending and shearing stresses.
Metacarpal radial index (MCRI)	Greatest length of metacarpal 3 divided by the functional length of the radius (MC3L/RL). Indicates relative proportions of the third metacarpal compared to the radius.
Metacarpal humeral index (MCHUM)	Greatest length of metacarpal 3 divided by the functional length of the humerus (MC3L/HL). Indicates relative proportions of the third metacarpal compared to the length of the humerus.
Humeral femoral index (HFI)	Functional length of the radius divided by the functional length of the femur(HL/FL). Indicates relative proportions of the humerus compared to the femur.
