# Supplementary material for: A hyaena on stilts: comparison of the limb morphology of Ictitherium ebu (Mammalia: Hyaenidae) from the Late Miocene of Lothagam, Turkana Basin, Kenya with extant Canidae and Hyaenidae
Source: PeerJ. 2024 Jun 10;12:e17405. doi: 10.7717/peerj.17405 (PMC11172688; doi:10.7717/peerj.17405)
Supplement: Supplemental Information 8 — The mean and standard deviation of the data, as well as significant differences between species as a result of pairwise PERMANOVAs. The other tables contain: pairs of species compared (pairs), degrees of freedom (Df), sum of squares (SumOfSq), F-statistic of the model (F), R-squared of the model (R2), p-value, the Holm corrected p-value (p-adjusted) and if the PERMANOVA was significant (sig) (with a dot if the value is significant under p.adjusted) (Holm, 1979); Martinez (Arbizu, 2020). Ie is Ictitherium ebu, Cb is the maned wolf, Cc is the spotted hyaena, Hh is the striped hyaena, Pc is the aardwolf, Pb is the spotted hyaena, Clu is the wolf, Vv is the red fox, La is the side-striped jackal, Cla is the coyote. [file peerj-12-17405-s008.xlsx]

## Sheet: Differences
Table S16.A. Mean and standard deviation of the data, as well as significant differences between species as a result of pairwise PERMANOVAs.
	a. Maned wolf n = 12			b. Spotted hyaena n = 9			c. Striped hyaena n = 12			d. Aardwolf n = 10
	Mean	SD	Significance	Mean	SD	Significance	Mean	SD	Significance	Mean	SD	Significance
SMI	0.35	0.03	b,c,e	0.5	0.04	a,d,e,f,g	0.47	0.05	a,d,e,f,g	0.38	0.04	b,c
BI	1.06	0.03	c,e,f,g	1.02	0.03	c,f	1.09	0.03	a,b,d,e,f,g	1.03	0.03	c,e,f,g
HRI	0.06	0.003	b,c,e	0.08	0.01	a	0.08	0.01	a,f	0.07	0.01
OLI	0.08	0.01	b,c,d,e,f,g	0.13	0.02	a,c,d	0.1	0.01	a,b,f	0.1	0.01	a,b,e,f
URI	0.04	0.01	b,c,e,f	0.06	0.01	a,d	0.05	0.01	a,e	0.05	0.01	b,e
FRI	0.06	0.003	b,c,d,e,f	0.09	0.01	a,e,f,g	0.08	0.01	a	0.08	0.01	a,f
GI	0.1	0.002	b,e	0.12	0.01	a,d,f	0.11	0.01		0.1	0.01	b,e
FEI	0.15	0.01	b,c,d,e,f,g	0.2	0.01	a,c,d,e,f,g	0.17	0.01	a,b	0.17	0.01	a,b
HEI	0.17	0.01	b,c,d,e,g	0.24	0.02	a,d,e,f,g	0.22	0.02	a,d,e,f,g	0.19	0.01	a,b,c,f
RRI	0.06	0.01	b,c,d,e,f,g	0.1	0.01	a,c,f	0.07	0.01	a,b	0.08	0.01	a
MCRI	0.43	0.02	d,g	0.45	0.03	d,g	0.41	0.02	a,c,e,f	0.46	0.01	d,g
HFI	0.93	0.02	d	0.9	0.03	d,e,f	0.94	0.03	d	0.99	0.02	a,b,c,e,f,g
MCHUM	0.45	0.01	d,e,f	0.45	0.03	e,f	0.45	0.02	e,f	0.47	0.01	a,e,f,g
	e. Wolf n = 12			f. Fox n = 10			g. Side-striped jackal n = 10
	Mean	SD	Significance	Mean	SD	Significance	Mean	SD	Significance
SMI	0.41	0.03	a,b,c	0.38	0.03	b,c	0.39	0.03	b,c
BI	0.99	0.02	a,c,d,f	0.93	0.02	a,b,c,d,e	0.98	0.05	a,c,d
HRI	0.07	0.01	a	0.07	0.004	c	0.07	0.01
OLI	0.11	0.01	a,d	0.11	0.01	a,c,d	0.1	0.01	a
URI	0.06	0.01	a,c,d,g	0.05	0.01	a	0.05	0.01	e
FRI	0.08	0	a,b,f	0.07	0.004	a,b,d,e	0.07	0.01	b
GI	0.12	0	a,d,f	0.1	0.01	b,e	0.11	0.01
FEI	0.18	0.01	a,b,f	0.16	0.01	a,b,e	0.17	0.01	a,b
HEI	0.2	0.01	a,b,c,f	0.17	0.01	b,c,d,e,g	0.19	0.01	a,b,c,f
RRI	0.09	0.01	a,f	0.08	0.004	a,b,e	0.08	0.02	a
MCRI	0.42	0.01	d,g	0.41	0.03	a,c,e,f	0.46	0.02
HFI	0.94	0.01	b,d	0.95	0.02	b,d	0.92	0.02	d
MCHUM	0.42	0.01	a,b,c,d,f,g	0.38	0.03	a,b,c,d,e,g	0.45	0.02	d,e,f

## Sheet: PairwiseBI
Table S16.B. Pairwise PERMANOVA of the BI index. Pairs is the pairs of species compared, Df the degrees of freedom, SumOfSq the sum of squares, F the F-statistic of the model, R2 the R-squared of the model, p.value the p-value, p-adjusted the Holm corrected p-value and sig the significance (with a dot if the value is significant under p.adjusted) (Holm, 1979; Martinez Arbizu, 2020).
Cb is the maned wolf, Cc is the spotted hyaena, Hh is the striped hyaena, Pc is the aardwolf, Clu is the wolf, Vv is the red fox, La is the side-striped jackal.
	pairs	Df	SumsOfSqs	F.Model	R2	p.value	p.adjusted	sig
1	Cb vs Cc	1	0.00163444	6.65201	0.259317	0.014	0.098
2	Cb vs Hh	1	0.00168836	7.61266	0.257075	0.006	0.048	.
3	Cb vs Pc	1	0.00131931	5.29377	0.209291	0.039	0.12
4	Cb vs Clu	1	0.00735181	44.0347	0.666842	0.001	0.021	.
5	Cb vs Vv	1	0.0222415	141.967	0.876518	0.001	0.021	.
6	Cb vs La	1	0.00922975	20.6834	0.508399	0.001	0.021	.
7	Cc vs Hh	1	0.00615289	24.2107	0.560294	0.002	0.024	.
8	Cc vs Pc	1	2.4519e-05	0.0844832	0.00494502	0.774	1
9	Cc vs Clu	1	0.00151825	7.96336	0.29534	0.014	0.098
10	Cc vs Vv	1	0.0100538	55.442	0.76533	0.001	0.021	.
11	Cc vs La	1	0.00258013	4.94264	0.225253	0.024	0.12
12	Hh vs Pc	1	0.00569623	22.1444	0.525442	0.002	0.024	.
13	Hh vs Clu	1	0.0160688	92.2229	0.807394	0.001	0.021	.
14	Hh vs Vv	1	0.0353881	214.891	0.914854	0.001	0.021	.
15	Hh vs La	1	0.0182557	40.1885	0.66771	0.001	0.021	.
16	Pc vs Clu	1	0.00206487	10.4858	0.343957	0.002	0.024	.
17	Pc vs Vv	1	0.0116841	61.88	0.774662	0.001	0.021	.
18	Pc vs La	1	0.00327926	6.42278	0.262983	0.004	0.036	.
19	Clu vs Vv	1	0.0045618	43.7087	0.686071	0.001	0.021	.
20	Clu vs La	1	0.000211196	0.536109	0.0261057	0.544	1
21	Vv vs La	1	0.0025837	6.33677	0.260378	0.024	0.12

## Sheet: PairwiseFEI
Table S16.C. Pairwise PERMANOVA of the FEI index. Pairs is the pairs of species compared, Df the degrees of freedom, SumOfSq the sum of squares, F the F-statistic of the model, R2 the R-squared of the model, p.value the p-value, p-adjusted the Holm corrected p-value and sig the significance (with a dot if the value is significant under p.adjusted) (Holm, 1979; Martinez Arbizu, 2020).
Cb is the maned wolf, Cc is the spotted hyaena, Hh is the striped hyaena, Pc is the aardwolf, Clu is the wolf, Vv is the red fox, La is the side-striped jackal.
	pairs	Df	SumsOfSqs	F.Model	R2	p.value	p.adjusted	sig
1	Cb vs Cc	1	0.119756	129.912	0.872408	0.001	0.021	.
2	Cb vs Hh	1	0.0353718	39.6797	0.643318	0.001	0.021	.
3	Cb vs Pc	1	0.0343041	57.4993	0.741933	0.001	0.021	.
4	Cb vs Clu	1	0.0561318	110.148	0.83352	0.001	0.021	.
5	Cb vs Vv	1	0.0154923	26.7325	0.572032	0.001	0.021	.
6	Cb vs La	1	0.0296942	55.0859	0.733638	0.001	0.021	.
7	Cc vs Hh	1	0.0302322	25.9595	0.577397	0.001	0.021	.
8	Cc vs Pc	1	0.0261689	30.7917	0.64429	0.001	0.021	.
9	Cc vs Clu	1	0.0166574	23.056	0.548221	0.001	0.021	.
10	Cc vs Vv	1	0.0475938	57.3566	0.771372	0.001	0.021	.
11	Cc vs La	1	0.0302247	38.6424	0.694477	0.001	0.021	.
12	Hh vs Pc	1	3.62742e-05	0.0438503	0.00218772	0.834	1
13	Hh vs Clu	1	0.00239841	3.33452	0.13162	0.076	0.348
14	Hh vs Vv	1	0.00305643	3.77264	0.158697	0.066	0.348
15	Hh vs La	1	5.80585e-05	0.0754321	0.00375743	0.788	1
16	Pc vs Clu	1	0.0016779	4.12042	0.170827	0.058	0.348
17	Pc vs Vv	1	0.00341535	7.21245	0.286067	0.017	0.136
18	Pc vs La	1	0.000155504	0.362854	0.0197602	0.543	1
19	Clu vs Vv	1	0.0103983	26.6525	0.571298	0.001	0.021	.
20	Clu vs La	1	0.00291455	8.33519	0.294164	0.007	0.063
21	Vv vs La	1	0.00211564	5.16524	0.222974	0.033	0.231

## Sheet: PairwiseFRI
Table S16.D. Pairwise PERMANOVA of the FRI index. Pairs is the pairs of species compared, Df the degrees of freedom, SumOfSq the sum of squares, F the F-statistic of the model, R2 the R-squared of the model, p.value the p-value, p-adjusted the Holm corrected p-value and sig the significance (with a dot if the value is significant under p.adjusted) (Holm, 1979; Martinez Arbizu, 2020).
Cb is the maned wolf, Cc is the spotted hyaena, Hh is the striped hyaena, Pc is the aardwolf, Clu is the wolf, Vv is the red fox, La is the side-striped jackal.
	pairs	Df	SumsOfSqs	F.Model	R2	p.value	p.adjusted	sig
1	Cb vs Cc	1	0.115426	112.169	0.855148	0.001	0.021	.
2	Cb vs Hh	1	0.0488253	18.2186	0.452989	0.002	0.03	.
3	Cb vs Pc	1	0.0931631	31.4269	0.611098	0.001	0.021	.
4	Cb vs Clu	1	0.0571256	85.4606	0.795274	0.001	0.021	.
5	Cb vs Vv	1	0.0162267	25.1962	0.557485	0.001	0.021	.
6	Cb vs La	1	0.00866988	4.98159	0.199411	0.027	0.225
7	Cc vs Hh	1	0.0183487	5.29991	0.218104	0.025	0.225
8	Cc vs Pc	1	0.00175907	0.452348	0.025919	0.534	1
9	Cc vs Clu	1	0.0145277	12.823	0.402948	0.003	0.039	.
10	Cc vs Vv	1	0.0437639	37.7652	0.689584	0.001	0.021	.
11	Cc vs La	1	0.0574531	23.4628	0.579861	0.002	0.03	.
12	Hh vs Pc	1	0.00909439	1.72379	0.0793502	0.2	0.8
13	Hh vs Clu	1	0.000446368	0.161161	0.00727224	0.725	1
14	Hh vs Vv	1	0.00725152	2.45366	0.109276	0.133	0.798
15	Hh vs La	1	0.0138712	3.4235	0.146157	0.071	0.497
16	Pc vs Clu	1	0.00662383	2.16243	0.0975719	0.148	0.798
17	Pc vs Vv	1	0.0298549	9.04125	0.33435	0.004	0.048	.
18	Pc vs La	1	0.0414925	9.17923	0.33773	0.006	0.066
19	Clu vs Vv	1	0.0102062	13.7418	0.407264	0.001	0.021	.
20	Clu vs La	1	0.0181643	9.87683	0.330585	0.01	0.1
21	Vv vs La	1	0.00111354	0.573397	0.0308719	0.442	1

## Sheet: PairwiseGI
Table S16.E. Pairwise PERMANOVA of the GI index. Pairs is the pairs of species compared, Df the degrees of freedom, SumOfSq the sum of squares, F the F-statistic of the model, R2 the R-squared of the model, p.value the p-value, p-adjusted the Holm corrected p-value and sig the significance (with a dot if the value is significant under p.adjusted) (Holm, 1979; Martinez Arbizu, 2020).
Cb is the maned wolf, Cc is the spotted hyaena, Hh is the striped hyaena, Pc is the aardwolf, Clu is the wolf, Vv is the red fox, La is the side-striped jackal.
	pairs	Df	SumsOfSqs	F.Model	R2	p.value	p.adjusted	sig
1	Cb vs Cc	1	0.0456117	60.0596	0.759675	0.001	0.021	.
2	Cb vs Hh	1	0.0160144	7.04775	0.242626	0.011	0.121
3	Cb vs Pc	1	0.00283479	3.68678	0.155647	0.073	0.584
4	Cb vs Clu	1	0.0331938	108.482	0.831395	0.001	0.021	.
5	Cb vs Vv	1	0.00144223	2.5924	0.114747	0.107	0.623
6	Cb vs La	1	0.00343161	3.217	0.138562	0.089	0.623
7	Cc vs Hh	1	0.00931375	2.88833	0.131958	0.1	0.623
8	Cc vs Pc	1	0.0641222	40.8947	0.706364	0.001	0.021	.
9	Cc vs Clu	1	0.00207872	2.19309	0.103481	0.165	0.66
10	Cc vs Vv	1	0.0573339	43.5043	0.719028	0.001	0.021	.
11	Cc vs La	1	0.0226156	11.7892	0.4095	0.004	0.06
12	Hh vs Pc	1	0.0297096	9.55042	0.323191	0.008	0.104
13	Hh vs Clu	1	0.00320635	1.31678	0.0564735	0.262	0.786
14	Hh vs Vv	1	0.0248242	8.56527	0.299849	0.01	0.12
15	Hh vs La	1	0.0038657	1.13409	0.0536619	0.302	0.786
16	Pc vs Clu	1	0.051063	53.8697	0.729253	0.001	0.021	.
17	Pc vs Vv	1	0.000214058	0.164992	0.00908297	0.677	0.786
18	Pc vs La	1	0.0112862	6.05329	0.251662	0.028	0.28
19	Clu vs Vv	1	0.0445366	60.5676	0.751761	0.001	0.021	.
20	Clu vs La	1	0.0132641	10.6479	0.347426	0.005	0.07
21	Vv vs La	1	0.00843545	5.18059	0.223488	0.028	0.28

## Sheet: PairwiseHEI
Table S16.F. Pairwise PERMANOVA of the HEI index. Pairs is the pairs of species compared, Df the degrees of freedom, SumOfSq the sum of squares, F the F-statistic of the model, R2 the R-squared of the model, p.value the p-value, p-adjusted the Holm corrected p-value and sig the significance (with a dot if the value is significant under p.adjusted) (Holm, 1979; Martinez Arbizu, 2020).
Cb is the maned wolf, Cc is the spotted hyaena, Hh is the striped hyaena, Pc is the aardwolf, Clu is the wolf, Vv is the red fox, La is the side-striped jackal.
	pairs	Df	SumsOfSqs	F.Model	R2	p.value	p.adjusted	sig
1	Cb vs Cc	1	0.116473	77.7858	0.80369	0.001	0.021	.
2	Cb vs Hh	1	0.0829544	48.616	0.688456	0.001	0.021	.
3	Cb vs Pc	1	0.00957079	7.55751	0.274245	0.007	0.049	.
4	Cb vs Clu	1	0.027344	28.4029	0.563517	0.001	0.021	.
5	Cb vs Vv	1	0.000228974	0.220983	0.0109284	0.661	1
6	Cb vs La	1	0.0115394	8.83741	0.306456	0.008	0.049	.
7	Cc vs Hh	1	0.00572955	3.21141	0.144584	0.102	0.32
8	Cc vs Pc	1	0.0567139	44.4564	0.723381	0.001	0.021	.
9	Cc vs Clu	1	0.0364038	39.436	0.674858	0.001	0.021	.
10	Cc vs Vv	1	0.116704	116.14	0.872315	0.001	0.021	.
11	Cc vs La	1	0.0525508	39.7507	0.700444	0.001	0.021	.
12	Hh vs Pc	1	0.0316828	20.589	0.507256	0.001	0.021	.
13	Hh vs Clu	1	0.0154818	12.7909	0.367651	0.003	0.027	.
14	Hh vs Vv	1	0.0839498	64.1529	0.762337	0.001	0.021	.
15	Hh vs La	1	0.0283581	17.969	0.473255	0.001	0.021	.
16	Pc vs Clu	1	0.00359498	4.98707	0.199586	0.037	0.185
17	Pc vs Vv	1	0.0116719	15.049	0.455354	0.003	0.027	.
18	Pc vs La	1	8.51917e-05	0.0792387	0.00438286	0.774	1
19	Clu vs Vv	1	0.0298321	60.804	0.752488	0.001	0.021	.
20	Clu vs La	1	0.00253223	3.33096	0.14277	0.08	0.32
21	Vv vs La	1	0.0137437	16.7747	0.482383	0.002	0.021	.

## Sheet: PairwiseHFI
Table S16.G. Pairwise PERMANOVA of the HFI index. Pairs is the pairs of species compared, Df the degrees of freedom, SumOfSq the sum of squares, F the F-statistic of the model, R2 the R-squared of the model, p.value the p-value, p-adjusted the Holm corrected p-value and sig the significance (with a dot if the value is significant under p.adjusted) (Holm, 1979; Martinez Arbizu, 2020).
Cb is the maned wolf, Cc is the spotted hyaena, Hh is the striped hyaena, Pc is the aardwolf, Clu is the wolf, Vv is the red fox, La is the side-striped jackal.
	pairs	Df	SumsOfSqs	F.Model	R2	p.value	p.adjusted	sig
1	Cb vs Cc	1	0.00118026	6.54659	0.256261	0.025	0.216
2	Cb vs Hh	1	0.000295229	1.99808	0.0832599	0.163	0.972
3	Cb vs Pc	1	0.00473592	46.9942	0.701466	0.001	0.021	.
4	Cb vs Clu	1	9.87672e-05	1.84033	0.0771939	0.207	0.972
5	Cb vs Vv	1	0.000671936	7.25946	0.26631	0.016	0.16
6	Cb vs La	1	0.000213394	1.90094	0.0867971	0.162	0.972
7	Cc vs Hh	1	0.00252325	9.82214	0.340785	0.008	0.096
8	Cc vs Pc	1	0.00941382	43.8948	0.72083	0.001	0.021	.
9	Cc vs Clu	1	0.00189685	12.8209	0.402909	0.003	0.048	.
10	Cc vs Vv	1	0.00326074	15.9218	0.483625	0.003	0.048	.
11	Cc vs La	1	0.000374874	1.6444	0.088198	0.215	0.972
12	Hh vs Pc	1	0.00274957	15.8427	0.442006	0.003	0.048	.
13	Hh vs Clu	1	5.28452e-05	0.441003	0.0196516	0.514	0.972
14	Hh vs Vv	1	9.11044e-05	0.55102	0.0268123	0.459	0.972
15	Hh vs La	1	0.000959648	5.1863	0.205918	0.024	0.216
16	Pc vs Clu	1	0.00352353	50.2948	0.715484	0.001	0.021	.
17	Pc vs Vv	1	0.00168779	14.6647	0.448947	0.002	0.034	.
18	Pc vs La	1	0.00637592	46.5471	0.721134	0.001	0.021	.
19	Clu vs Vv	1	0.0002707	4.37737	0.179567	0.046	0.322
20	Clu vs La	1	0.00058001	7.11335	0.262356	0.013	0.143
21	Vv vs La	1	0.0015052	11.7733	0.395432	0.005	0.065

## Sheet: PairwiseHRI
Table S16.H. Pairwise PERMANOVA of the HRI index. Pairs is the pairs of species compared, Df the degrees of freedom, SumOfSq the sum of squares, F the F-statistic of the model, R2 the R-squared of the model, p.value the p-value, p-adjusted the Holm corrected p-value and sig the significance (with a dot if the value is significant under p.adjusted) (Holm, 1979; Martinez Arbizu, 2020).
Cb is the maned wolf, Cc is the spotted hyaena, Hh is the striped hyaena, Pc is the aardwolf, Clu is the wolf, Vv is the red fox, La is the side-striped jackal.
	pairs	Df	SumsOfSqs	F.Model	R2	p.value	p.adjusted	sig
1	Cb vs Cc	1	0.0556618	20.467	0.518585	0.002	0.036	.
2	Cb vs Hh	1	0.0475379	26.3042	0.544553	0.001	0.021	.
3	Cb vs Pc	1	0.0139496	12.0829	0.376615	0.007	0.105
4	Cb vs Clu	1	0.0308544	26.8392	0.549542	0.001	0.021	.
5	Cb vs Vv	1	0.00267871	3.53514	0.150207	0.075	0.825
6	Cb vs La	1	0.00579132	3.14801	0.135995	0.104	0.825
7	Cc vs Hh	1	0.00126904	0.315504	0.0163342	0.62	1
8	Cc vs Pc	1	0.0138308	3.93488	0.187958	0.058	0.696
9	Cc vs Clu	1	0.00566682	1.73786	0.0838013	0.23	1
10	Cc vs Vv	1	0.0320508	10.5148	0.38215	0.005	0.085
11	Cc vs La	1	0.0242391	5.60956	0.248106	0.03	0.39
12	Hh vs Pc	1	0.00815093	3.40751	0.145573	0.082	0.825
13	Hh vs Clu	1	0.00185895	0.817246	0.035817	0.372	1
14	Hh vs Vv	1	0.0245259	12.2919	0.380649	0.001	0.021	.
15	Hh vs La	1	0.0173701	5.64473	0.220113	0.023	0.322
16	Pc vs Clu	1	0.00244612	1.46593	0.0682909	0.238	1
17	Pc vs Vv	1	0.00405417	3.14053	0.148555	0.084	0.825
18	Pc vs La	1	0.00163706	0.656645	0.0351963	0.435	1
19	Clu vs Vv	1	0.0134449	10.5708	0.34578	0.006	0.096
20	Clu vs La	1	0.00836	3.55165	0.150803	0.089	0.825
21	Vv vs La	1	0.000583762	0.284452	0.0155571	0.574	1

## Sheet: PairwiseMCHUM
Table S16.I. Pairwise PERMANOVA of the MCHUM index. Pairs is the pairs of species compared, Df the degrees of freedom, SumOfSq the sum of squares, F the F-statistic of the model, R2 the R-squared of the model, p.value the p-value, p-adjusted the Holm corrected p-value and sig the significance (with a dot if the value is significant under p.adjusted) (Holm, 1979; Martinez Arbizu, 2020).
Cb is the maned wolf, Cc is the spotted hyaena, Hh is the striped hyaena, Pc is the aardwolf, Clu is the wolf, Vv is the red fox, La is the side-striped jackal.
	pairs	Df	SumsOfSqs	F.Model	R2	p.value	p.adjusted	sig
1	Cb vs Cc	1	7.59819e-05	0.107805	0.00564192	0.765	1
2	Cb vs Hh	1	3.59819e-05	0.0740533	0.00335477	0.797	1
3	Cb vs Pc	1	0.00200471	10.7461	0.349511	0.005	0.05	.
4	Cb vs Clu	1	0.0090548	52.7605	0.705727	0.001	0.021	.
5	Cb vs Vv	1	0.0419372	53.917	0.729426	0.001	0.021	.
6	Cb vs La	1	0.000185687	0.621616	0.0301439	0.423	1
7	Cc vs Hh	1	1.0421e-05	0.00993578	0.000522663	0.962	1
8	Cc vs Pc	1	0.00116488	1.52692	0.0824164	0.233	1
9	Cc vs Clu	1	0.00920734	13.4426	0.41435	0.001	0.021	.
10	Cc vs Vv	1	0.0392001	26.8771	0.612554	0.001	0.021	.
11	Cc vs La	1	0.000420085	0.469446	0.0268724	0.514	1
12	Hh vs Pc	1	0.00154767	3.01472	0.130991	0.1	0.8
13	Hh vs Clu	1	0.0101521	21.6588	0.496092	0.001	0.021	.
14	Hh vs Vv	1	0.0440633	39.8896	0.666052	0.001	0.021	.
15	Hh vs La	1	0.000362903	0.580147	0.0281897	0.462	1
16	Pc vs Clu	1	0.0183347	109.347	0.845377	0.001	0.021	.
17	Pc vs Vv	1	0.0568507	67.6165	0.78976	0.001	0.021	.
18	Pc vs La	1	0.00312216	10.122	0.359931	0.005	0.05	.
19	Clu vs Vv	1	0.0131567	17.3358	0.464321	0.001	0.021	.
20	Clu vs La	1	0.00594473	21.2435	0.515075	0.001	0.021	.
21	Vv vs La	1	0.033514	34.7149	0.658541	0.001	0.021	.

## Sheet: PairwiseMCRI
Table S16.J. Pairwise PERMANOVA of the MCRI index. Pairs is the pairs of species compared, Df the degrees of freedom, SumOfSq the sum of squares, F the F-statistic of the model, R2 the R-squared of the model, p.value the p-value, p-adjusted the Holm corrected p-value and sig the significance (with a dot if the value is significant under p.adjusted) (Holm, 1979; Martinez Arbizu, 2020).
Cb is the maned wolf, Cc is the spotted hyaena, Hh is the striped hyaena, Pc is the aardwolf, Clu is the wolf, Vv is the red fox, La is the side-striped jackal.
	pairs	Df	SumsOfSqs	F.Model	R2	p.value	p.adjusted	sig
1	Cb vs Cc	1	0.00233832	2.5121	0.116776	0.124	1
2	Cb vs Hh	1	0.00124911	2.67967	0.108578	0.116	1
3	Cb vs Pc	1	0.00656166	17.2677	0.463342	0.002	0.028	.
4	Cb vs Clu	1	9.05058e-05	0.346296	0.0154968	0.591	1
5	Cb vs Vv	1	0.00316825	2.72355	0.119856	0.103	1
6	Cb vs La	1	0.00681752	16.4062	0.450643	0.001	0.021	.
7	Cc vs Hh	1	0.00655262	7.02673	0.269981	0.014	0.182
8	Cc vs Pc	1	0.000855323	0.965324	0.0537326	0.352	1
9	Cc vs Clu	1	0.00326711	4.69816	0.19825	0.024	0.288
10	Cc vs Vv	1	0.00966783	5.34856	0.239325	0.034	0.374
11	Cc vs La	1	0.000940986	1.01414	0.0562967	0.389	1
12	Hh vs Pc	1	0.0131459	34.4483	0.632679	0.001	0.021	.
13	Hh vs Clu	1	0.00067484	2.56765	0.104514	0.123	1
14	Hh vs Vv	1	0.000527281	0.452642	0.0221312	0.573	1
15	Hh vs La	1	0.0135056	32.375	0.618138	0.001	0.021	.
16	Pc vs Clu	1	0.00810766	51.8572	0.72167	0.001	0.021	.
17	Pc vs Vv	1	0.0171755	14.9767	0.45416	0.001	0.021	.
18	Pc vs La	1	2.33764e-06	0.00739755	0.000410806	0.937	1
19	Clu vs Vv	1	0.00226008	2.40529	0.107354	0.111	1
20	Clu vs La	1	0.00839229	43.7338	0.686195	0.001	0.021	.
21	Vv vs La	1	0.0175643	14.8058	0.451316	0.001	0.021	.

[truncated: 4 more sheets: PairwiseOLI, PairwiseRRI, PairwiseSMI, PairwiseURI]
